# Supplementary material for: Konstruktion und Validierung eines Assessments von Offenheit für Vielfalt für (angehende) Lehrer und Lehrerinnen
Source: Atypon-hosted journal article supplement (doi:10.1024/1010-0652/a000354), 2022-11-29
Supplement: 1010-0652_a000354_esm1.pdf [file 1010-0652_a000354_esm1.pdf]

## **ESM 1.1.: Leitfaden für das Interview nach der Critical Incident Technique mit dem Target Attribute Migration**

(Anmerkung: Leitfaden unterscheidet sich je nach Target Attribute, z.B. Offenheit für Vielfalt bei Inklusion)

Aufklärung der Lehrenden über Interview (persönliche Hilfestellung):

Tonbandaufnahme mit Einverständnis

Sinn des Interviews: kritische Situationen im Lehrberuf herauskristallisieren

Betonung: Wichtig, sich so gut wie möglich an vergangene Ereignisse zu erinnern (Erinnerung und empathisches Hineinversetzen, mit Details)

Mitteilen, was zu Situationen beigetragen hat, genaue Handlungsumstände schildern, beteiligte Personen erinnern.

Zusätzlich können verschiedene Perspektiven, wie Interviewte handeln können genannt werden und eventuelle Konsequenzen für dieses Verhalten genannt werden.

Wenn Sie an den Begriff Vielfalt denken, welche Assoziationen haben Sie?

Was assoziieren Sie mit dem Thema Chancengleichheit?

Haben Sie sich in der Vergangenheit mit einem dieser Begriffe stärker auseinandergesetzt?

- 1) Gibt es in Ihrem Beruf oder Alltag Menschen die aufgrund ihres Migrationshintergrundes benachteiligt werden oder bereits in einer Situation benachteiligt wurden?
- 2) Fallen Ihnen Situationen ein, in denen Personen mit Migrationshintergrund in der Schule benachteiligt wurden oder in denen Menschen mit Migrationshintergrund sich schwierig verhalten haben, so dass schwerwiegende Konsequenzen darauf folgten? Lag dieses Verhalten möglicherweise an dem Migrationshintergrund?
- 3) Denken Sie an eine Situation (im schulischen/pädagogischen Alltag) zurück in der jemand (z.B. Freunde, Angehörige, KollegInnen) sich benachteiligend gegenüber Personen mit Migrationshintergrund verhalten hat?
  - Beschreiben Sie diese Situation: Wie ist es zu dieser Situation gekommen? Wer war beteiligt? Wann und wo hat sich das abgespielt? Warum ist diese Situation eingetreten?
  - Wie hat die Person gehandelt (agiert) oder reagiert?
  - Was war die Konsequenz dieses Verhaltens?
- 4) Erinnern Sie sich an Situationen in ihrem Leben (oder im schulischen/pädagogischen Kontext), in denen es Ihnen schwer gefallen ist (oder nicht gelungen ist) eine Person mit Migrationshintergrund gleichwertig zu behandeln? Oder gemäß ihren Einstellungen und Werthaltungen?
  - Beschreiben Sie diese Situation: Wer war beteiligt? Wie ist es zu dieser Situation gekommen? Wann und wo ist es passiert? Warum ist diese Situation eingetreten?
  - Wie haben Sie gehandelt/reagiert?
  - Was war die Konsequenz Ihres Verhaltens?
- 5) Nur für den Fall von Benachteiligungen: Waren Sie einmal in einer Situation in ihrem Leben (+ schulischer/pädagogischer Kontext), in der Sie aufgrund Ihres Migrationshintergrundes benachteiligt wurden?

- Beschreiben Sie diese Situation: Wer war beteiligt? Wie ist es zu dieser Situation gekommen? Wann und wo ist das passiert? Warum ist diese Situation eingetreten? (Gab es noch weitere Kontextfaktoren?)
- Gab es jemanden, der diese Situation ausgelöst hat?
- Sind irgendwelche Konsequenzen (Institution, für Sie, oder Beteiligte) eingetreten?

Falls sich Zeit und Möglichkeit ergibt, können auch diese Diversitätsfaktoren bzw. Faktoren, die zu Benachteiligungen führen abgefragt werden:

- Religion/Weltanschauung
- Migrationshintergrund
- Sexuelle Orientierung
- moderne/ nicht traditionelle Lebensformen
- Nationalität
- Sprache
- Sozioökonomischer Status
- Physische Behinderung/Einschränkung
- Psychische/kognitive Einschränkung/Behinderung
- Alter
- Geschlecht
- Allgemeine Weltanschauungen

#### Hilfestellungen

Situationen: über jemanden wurde besonders negativ oder positiv gedacht wurde (und daraus möglicherweise eine negative Handlung folgen könnte).

Es können Situationen genannt werden, in denen jemand besonders schlecht (und gegebenenfalls besonders gut behandelt wurde).

Es können Situationen genannt werden, in denen die Gerechtigkeit/Fairness in Frage gestellt werden kann.

#### Demographische Daten

Geschlecht: männlich weiblich

Alter:

Beruf/ Studium für / Unterrichten in welcher Schule:

Berufserfahrung als Lehrende seit:

## ESM 1.2.: Instruktion für die Entwicklung der Handlungsalternativen

Sehr geehrte Damen und Herren,

hier ist Ihre Kreativität gefragt: Bitte lesen Sie sich die folgenden Situationen aufmerksam durch. Diese Situationen betreffen Ereignisse die in dieser Form im pädagogischen Berufsalltag vorkommen könnten. Im Anschluss an jede Situation sollen Sie Ihre möglichen Reaktionen formulieren:

- (1) Ihr eigenes Verhalten: Wie würden Sie sich verhalten?
- (2) Wie würden Sie sich niemals verhalten?
- (3) Ein weiteres Verhalten schildern, wie man sich in dieser Situation verhalten könnte.

Je nach Situation können Sie variieren und sehr verschiedene Handlungsmöglichkeiten entwickeln. Dabei können auch Handlungen beschrieben werden, die besonders offen, verschlossen oder gar diskriminierend sind, jedoch sollten diese immer realistisch sein und so formuliert werden, dass sich beliebige außenstehende Personen für eben dieses Verhalten entscheiden könnten.

Versuchen Sie für die Handlungsmöglichkeiten 1 – 3 sich jeweils in eine Person hineinzusetzen (ggf. sich selbst), die so denken und handeln könnte! Dadurch fällt es Ihnen sicher leichter konkrete Gedanken zu formulieren und zu benennen, welche Hintergründe das Verhalten hat.

Beschreiben Sie das Verhalten jeweils in Bezug mit einem (max. zwei) Sätzen. Schildern Sie dabei möglichst genau,

WIE du handeln würdest

WER beteiligt/betroffen wäre

WESHALB du so handeln würdest

Und zu WELCHEN Konsequenzen dein Handeln führen könnte.

Falls Ihnen mal keine drei Handlungen einfallen, ist das nicht tragisch – versuchen Sie bitte trotzdem, sich die Zeit zu nehmen und alle Handlungsmuster abzudecken!

Beispiel:

Sie machen im Zuge Ihres Lehramtsstudiums ein Unterrichtspraktikum in einer 2. Klasse Gymnasium, welche auf Mehrsprachigkeit ausgerichtet ist. Sie beobachten für den heutigen Tag den Deutschunterricht. Allerdings ist in dieser Klasse nur ein Schüler, der deutsch nicht beherrscht. Er spricht nur Englisch. Die beiden Lehrenden erklären die Unterrichtsaufgabe auf Deutsch. Sie beobachten, dass der Junge nach der Erklärung seine Sitznachbarin etwas fragt. Sie hören, wie seine Schulkollegin dem englischsprachigen Jungen die Aufgabe nochmals auf Englisch erklärt, was Unruhe in die Klasse bringt.

- Ich stehe auf und erkläre dem Jungen die Aufgabe auf Englisch, damit seine Schulkollegin sich selbst auf ihre Aufgabe konzentrieren kann
- Ich informiere die beiden Lehrenden in einer anschließenden Reflexion, dass der englischsprachige Junge die Aufgabe nicht alleine lösen konnte
- Ich spreche die Lehrenden darauf an, dass scheinbar nicht alle Fragen geklärt sind
- Ich beobachte die Situation weiter, schließlich bin ich für den heutigen Tag zur Beobachtung da.
- Ich beobachte die Situation weiter, da diese Situation möglicherweise die Kooperation zwischen den beiden stärkt

DANKESCHÖN!

### ESM 1.3.: Onlineinstruktion ExpertInnenrating

Sehr geehrte Damen und Herren,

vielen Dank, dass Sie sich die Zeit nehmen, mit Ihrer Expertise, meine Masterarbeit zu unterstützen. Darin soll ein *Situational Judgment Test* zur Erfassung von *Offenheit für Vielfalt* entwickelt werden, der im pädagogischen Alltag relevant sein kann.

In vorangegangenen Arbeitsschritten wurden insgesamt 41 Situationen und jeweils vier zugehörige Antwortalternativen entwickelt. Nun geht es darum 20 dieser Situationen im Hinblick auf das Konstrukt *Offenheit für Vielfalt* zu bewerten. Offenheit für Vielfalt kann hier als Merkmal der Persönlichkeit angesehen werden, das Veränderungspotential in sich birgt.

Es bedeutet, dass verschiedene Lebenslagen vorurteilsfrei begegnet werden können und angemessen auf anspruchsvolle Situationen im Bereich der Diversität umgegangen werden kann. Es soll auch den Wunsch nach kritischem Diskurs und die Fähigkeit sich mit verschiedenen oder neuen Ansichtsweisen zu konfrontieren beinhalten.

Verschlossen gegenüber Diversität sind dementsprechend Personen, die eher bewahrend agieren, integrative Aspekte ablehnen und zu sozial dominanten Verhalten neigen.

Ihre Aufgabe ist es nun die folgenden 20 (bzw. 21) Szenarien aufmerksam zu lesen und anschließend jede einzelne Handlungsmöglichkeit daraufhin zu beurteilen, wie offen oder nicht offen sie ist.

Dabei ist es auch wichtig, die jeweiligen situativen Umstände zu berücksichtigen und die Angemessenheit auf die jeweilige Situation zu bewerten.

Dafür steht Ihnen eine vierstufige Ratingskala zur Verfügung:

- (1) verschlossenste Handlungsmöglichkeit
- (2) eher verschlossene Handlungsmöglichkeit
- (3) eher offene Handlungsmöglichkeit
- (4) offenste Handlungsmöglichkeit.

Bitte achten Sie darauf, pro Situation jede Zahl nur einmal zu verwenden! Wenn Sie auf „weiter“ drücken, können Sie nicht mehr auf die vorige Seite zurück gehen.

Eine kurze Beschreibung des Konstrukts Offenheit für Vielfalt ist zur Erinnerung jeweils über den verschiedenen Situationen beschrieben.

Vielen Dank für Ihre Mitarbeit!
