# Supplementary material for: Konstruktion und Validierung eines Assessments von Offenheit für Vielfalt für (angehende) Lehrer und Lehrerinnen
Source: Atypon-hosted journal article supplement (doi:10.1024/1010-0652/a000354), 2022-11-29
Supplement: 1010-0652_a000354_esm2.pdf [file 1010-0652_a000354_esm2.pdf]

# Openness to diversity questionnaire

| Nr. | Deutsch                                                                                                                                                                                                                                                                                                                                                                                                                                                                                                                                                                                                                                                                                                                                                                                                                                                                                                                                                                                                           | English                                                                                                                                                                                                                                                                                                                                                                                                                                                                                                                                                                                                                                                                                                                                                                                                                     |
|-----|-------------------------------------------------------------------------------------------------------------------------------------------------------------------------------------------------------------------------------------------------------------------------------------------------------------------------------------------------------------------------------------------------------------------------------------------------------------------------------------------------------------------------------------------------------------------------------------------------------------------------------------------------------------------------------------------------------------------------------------------------------------------------------------------------------------------------------------------------------------------------------------------------------------------------------------------------------------------------------------------------------------------|-----------------------------------------------------------------------------------------------------------------------------------------------------------------------------------------------------------------------------------------------------------------------------------------------------------------------------------------------------------------------------------------------------------------------------------------------------------------------------------------------------------------------------------------------------------------------------------------------------------------------------------------------------------------------------------------------------------------------------------------------------------------------------------------------------------------------------|
| I   | <p><b>Instruktion:</b> Im Folgenden finden Sie eine Reihe von herausfordernden Situationen, die in ihrem Berufsalltag als Lehrer oder Lehrerin vorkommen können. Zu jeder der Situationen gibt es vier Handlungsmöglichkeiten, die mögliche Reaktionen beschreiben. Bitte lesen Sie sich die einzelnen Situationen genau durch und versuchen Sie sich in die Rolle der jeweiligen Lehrperson hineinzusetzen. Wählen Sie anschließend jene Handlungsmöglichkeit aus, die Sie am ehesten beschreibt. Es kann dabei vorkommen, dass Sie keine Handlungsmöglichkeit finden, die zu Ihnen ganz genau passt –wählen Sie dann bitte jene aus, die Ihre mögliche Reaktion bestmöglich beschreibt. Versuchen Sie so ehrlich wie möglich zu antworten und sich immer wieder aufs Neue in die Situationen hineinzusetzen! Es gibt keine richtigen oder falschen Antworten.</p> <p><b>[Punkteschlüssel:</b> [1] verschlossenste Handlungsmöglichkeit gegenüber Vielfalt – [4] Offenste Handlungsmöglichkeit für Vielfalt]</p> | <p><b>Instructions:</b> Below you will find several challenging situations that may occur in your everyday work as a teacher. For each of the situations, there are four possible actions that describe possible reactions. Please read each situation carefully and try to put yourself in the role of the teacher. Then choose the possible action that best suits you. It may happen that you do not find an action option that fits you exactly - in this case, please choose the one that best describes your possible reaction. Try to answer as honestly as possible and remember to put yourself in the situation each time! There are no right or wrong answers.</p> <p><b>[Scoring system:</b> [1] most restrictive opportunity to act towards diversity - [4] Most open possibility of action for diversity]</p> |
| 1   | <p><b>In Ihrer Deutschklasse sind vier Jungen aus Syrien. Sie sind sich mittlerweile sicher, dass sie zwar schon viel Deutsch gelernt haben und meist dem Unterricht folgen können, dennoch manchmal Schwierigkeiten mit dem Verständnis haben. Zwei der Jungen fragen immer nach, wenn sie etwas nicht verstanden haben. Nun fällt Ihnen auf, dass die anderen beiden sich gar nicht beteiligen und Sie gar nicht wissen, ob sie dem Unterricht folgen können.</b></p>                                                                                                                                                                                                                                                                                                                                                                                                                                                                                                                                           | <p><b>In your language class there are four boys from Syria. You are certain that they have learned a lot and can usually follow and participate in the lessons, however they sometimes have difficulties in understanding. Two of the boys always ask questions when they haven't understood something. You notice that the other two boys do not participate at all and you do not know whether they can follow the lessons.</b></p> <p>○ In a personal conversation, I try to find out what level of language they have</p>                                                                                                                                                                                                                                                                                              |

|   |                                                                                                                                                                                                                                                                                                                                                                                                                                                                                                                                                                                                                                                                                                                                                                                                                                                                                                                                                                                                                                                                                                                                                |                                                                                                                                                                                                                                                                                                                                                                                                                                                                                                                                                                                                                                                                                                                                                                                                                                                                                                                                                                                                        |
|---|------------------------------------------------------------------------------------------------------------------------------------------------------------------------------------------------------------------------------------------------------------------------------------------------------------------------------------------------------------------------------------------------------------------------------------------------------------------------------------------------------------------------------------------------------------------------------------------------------------------------------------------------------------------------------------------------------------------------------------------------------------------------------------------------------------------------------------------------------------------------------------------------------------------------------------------------------------------------------------------------------------------------------------------------------------------------------------------------------------------------------------------------|--------------------------------------------------------------------------------------------------------------------------------------------------------------------------------------------------------------------------------------------------------------------------------------------------------------------------------------------------------------------------------------------------------------------------------------------------------------------------------------------------------------------------------------------------------------------------------------------------------------------------------------------------------------------------------------------------------------------------------------------------------------------------------------------------------------------------------------------------------------------------------------------------------------------------------------------------------------------------------------------------------|
|   | <ul style="list-style-type: none"> <li>○ Im persönlichen Gespräch versuche ich herauszufinden, welches sprachliche Niveau sie erreicht haben. Dabei werde ich sie dazu ermutigen Fragen zu stellen, wenn sie etwas nicht vollkommen verstanden haben. Außerdem werde ich verstärkt mit nonverbalen Wissenserwerb arbeiten. [4]</li> <li>○ Ich werde die Sprachentwicklung der beiden noch weiter beobachten. Im Unterricht versuche ich durch Blickkontakte sie zur Teilnahme zu motivieren. Falls sich ihr Sprachverständnis nicht steigert, werde ich mit dem Kollegium über passende Konzepte Rücksprache halten. [3]</li> <li>○ Ich werde das noch weiter beobachten. Selbst wenn sie die Aufgaben nicht immer verstehen, sollten sie lernen, dass sie nachfragen sollten. Falls sie einfach nur desinteressiert am Unterricht sind, muss ich sie ohnehin gewähren lassen. [1]</li> <li>○ Ich bitte die beiden viel fragenden Jungen ihren Kollegen die Schulübungen auf ihrer Sprache zu erklären oder ihnen bei den Hausübungen zu helfen. Mir ist es wichtig, dass nicht die ganze Klasse unter dieser Situation leidet. [2]</li> </ul> | <p>reached. I will encourage them to ask questions if they have not fully understood something. I will also work more with non-verbal knowledge acquisition. [4]</p> <ul style="list-style-type: none"> <li>○ I will continue to observe the development of their language skills. In class, I try to motivate them to participate through eye contact. If their language comprehension does not increase, I will discuss with the teaching staff about suitable concepts. [3]</li> <li>○ I will continue to observe this. Even if they do not always understand the tasks, they should learn that they should ask. If they are simply disinterested in the lesson, I must allow for this. [1]</li> <li>○ I ask the two active boys to explain the school exercises to their colleagues in their mother language or to help them with the exercises. It is important to me that the whole class does not suffer from this situation. [2]</li> </ul>                                                    |
| 2 | <p><b>Sie machen mit Ihrer Klasse ein gemeinsames Frühstück. Alle Schülerinnen und Schüler haben mitgebracht, was in dem Land ihrer Herkunft gefrühstückt wird. Ein österreichischer Schüler allerdings weigert sich daran teilzunehmen, da er mit „Multikulti“ nichts zu tun haben möchte.</b></p> <ul style="list-style-type: none"> <li>○ Ich versuche zu verstehen welche Vorbehalte er hat. Vielleicht kann ich ihm die nehmen. Ich lade ihn nochmals zum Frühstück ein, werde ihn aber auch nicht dazu zwingen. In zukünftigen Schulstunden konzentriere ich mich vermehrt auf Vor- und Nachteile von Globalisierung, um Interesse an Vielfalt zu wecken. [4]</li> <li>○ Ich frage ihn erstmal was er unter Multikulti versteht und was er dagegen hat. Aber da ich ihn nicht zu einem gemeinsamen</li> </ul>                                                                                                                                                                                                                                                                                                                            | <p><b>You are having a shared breakfast together with your class. All pupils have brought what is typically eaten for breakfast in the country of their origin. One pupil, however, refuses to take part because he does not want to have anything to do with "multiculturalism".</b></p> <ul style="list-style-type: none"> <li>○ I try to understand his concerns. Maybe I can change his mind. I invite him to breakfast again, but I won't force him. In future lessons, I will focus more on the advantages and disadvantages of globalization to arouse interest in diversity. [4]</li> <li>○ I first ask him about his understanding of multiculturalism and his objections to it. But as I don't want to force him to have breakfast together, I offer him to be taught in another class during this time. [3]</li> <li>○ I cannot force the boy to do anything. I offer to him the option of being taught in another class during the breakfast. I also don't think it is sensible</li> </ul> |

|   |                                                                                                                                                                                                                                                                                                                                                                                                                                                                                                                                                                                                                                                                                                                                                                                                                                                                                                                                                                                                                                                                                                                                                                                                                                                                                                     |                                                                                                                                                                                                                                                                                                                                                                                                                                                                                                                                                                                                                                                                                                                                                                                                                                                                                                                                                                                                                                                                                                                                                                                                                                                                                                                     |
|---|-----------------------------------------------------------------------------------------------------------------------------------------------------------------------------------------------------------------------------------------------------------------------------------------------------------------------------------------------------------------------------------------------------------------------------------------------------------------------------------------------------------------------------------------------------------------------------------------------------------------------------------------------------------------------------------------------------------------------------------------------------------------------------------------------------------------------------------------------------------------------------------------------------------------------------------------------------------------------------------------------------------------------------------------------------------------------------------------------------------------------------------------------------------------------------------------------------------------------------------------------------------------------------------------------------|---------------------------------------------------------------------------------------------------------------------------------------------------------------------------------------------------------------------------------------------------------------------------------------------------------------------------------------------------------------------------------------------------------------------------------------------------------------------------------------------------------------------------------------------------------------------------------------------------------------------------------------------------------------------------------------------------------------------------------------------------------------------------------------------------------------------------------------------------------------------------------------------------------------------------------------------------------------------------------------------------------------------------------------------------------------------------------------------------------------------------------------------------------------------------------------------------------------------------------------------------------------------------------------------------------------------|
|   | <p>Frühstück zwingen will, biete ich ihm an in einer anderen Klasse währenddessen unterrichtet zu werden. [3]</p> <ul style="list-style-type: none"> <li>○ Ich kann den Jungen zu nichts zwingen. Ich biete ihm an, dass er währenddessen in einer anderen Klasse unterrichtet wird. Störenfriede während des Frühstücks finde ich nämlich auch nicht sinnvoll. [1.5]</li> <li>○ Ich stelle den Schüler vor die Wahl – entweder am Frühstück teilzunehmen oder dies als unentschuldigte Fehlzeit eintragen zu lassen. Ich sage ihm aber auch, dass er sich dadurch selbst ausgrenzt – was er daraus mitnimmt, wird sich zeigen. [1.5]</li> </ul>                                                                                                                                                                                                                                                                                                                                                                                                                                                                                                                                                                                                                                                    | <p>to have troublemakers attend the breakfast. [1.5]</p> <ul style="list-style-type: none"> <li>○ I give the student the choice of either attending breakfast or having it recorded as an unexcused absence. But I also tell him that he is excluding himself by doing this - what he learns from this will be determined. [1.5]</li> </ul>                                                                                                                                                                                                                                                                                                                                                                                                                                                                                                                                                                                                                                                                                                                                                                                                                                                                                                                                                                         |
| 3 | <p><b>Als neuer Integrationslehrer* werden Sie von einem Klassenvorstand gebeten, mit den Integrationskindern* den Unterricht in einem anderen Raum durchzuführen, da die Kinder sonst den „Regelunterricht“ stören.</b></p> <ul style="list-style-type: none"> <li>○ Ich schildere dem Klassenvorstand, dass inklusiver Klassenunterricht für mich ein gemeinsames Unterrichten bedeutet und Integrationslehrer zur Unterstützung der Teilnahme am chancengleichen Unterricht dienen. Ich schlage ihm vor gemeinsam ein Konzept für inklusiven Unterricht zu gestalten. [4]</li> <li>○ Ich frage den Klassenvorstand, ob wir es nicht doch erstmal gemeinsam ausprobieren können. Falls die Integrationskinder im Regelunterricht tatsächlich nicht tragbar sind, können wir den Raum verlassen. Mich beschäftigt die Frage, was der Klassenvorstand für eine Auffassung von Inklusion hat. [3]</li> <li>○ Da ich die Integrationskinder noch nicht kenne werde ich seinen Ratschlag befolgen und die Kinder in einem anderen Raum unterrichten. Wenn ich die Kinder dann besser kenne, kann ich den Klassenvorstand nochmals darauf ansprechen ob auch gemeinsame Unterrichtseinheiten möglich sind. [2]</li> <li>○ Ich nehme seinen Ratschlag an da ich mir gut vorstellen kann, dass</li> </ul> | <p><b>As a new teacher for students with special needs*, you are asked by the class teacher to conduct lessons with the children with special needs* in another room, as these children otherwise disrupt the "regular lessons".</b></p> <ul style="list-style-type: none"> <li>○ I explain to the teacher that inclusive class teaching means teaching together and that teachers for students with special needs support participation in lessons to provide equal opportunities. I suggest that we collaborate on a concept for inclusive teaching. [4]</li> <li>○ I ask the class teacher if we can try a joint lesson first. If the children with special needs are not manageable in regular classes, we can leave the room. I wonder how the teacher perceives the concept of inclusion. [3]</li> <li>○ Since I don't know the children with special needs yet, I will follow his advice and teach the children in another room. After I know the children better, I can ask the teacher again whether joint lessons are possible. [2]</li> <li>○ I take his advice because I can imagine that the integration children and the regular school children benefit from separate lessons. In doing so, we could develop useful separate concepts which we could pass on to other class teachers. [1]</li> </ul> |

|   |                                                                                                                                                                                                                                                                                                                                                                                                                                                                                                                                                                                                                                                                                                                                                                                                                                                                                                                                                                                                                                                                                                                                                                                                                                                                                                                                                                                                                                                                                                                                               |                                                                                                                                                                                                                                                                                                                                                                                                                                                                                                                                                                                                                                                                                                                                                                                                                                                                                                                                                                                                                                                                                                                                                                                                                                                                                                                                                                              |
|---|-----------------------------------------------------------------------------------------------------------------------------------------------------------------------------------------------------------------------------------------------------------------------------------------------------------------------------------------------------------------------------------------------------------------------------------------------------------------------------------------------------------------------------------------------------------------------------------------------------------------------------------------------------------------------------------------------------------------------------------------------------------------------------------------------------------------------------------------------------------------------------------------------------------------------------------------------------------------------------------------------------------------------------------------------------------------------------------------------------------------------------------------------------------------------------------------------------------------------------------------------------------------------------------------------------------------------------------------------------------------------------------------------------------------------------------------------------------------------------------------------------------------------------------------------|------------------------------------------------------------------------------------------------------------------------------------------------------------------------------------------------------------------------------------------------------------------------------------------------------------------------------------------------------------------------------------------------------------------------------------------------------------------------------------------------------------------------------------------------------------------------------------------------------------------------------------------------------------------------------------------------------------------------------------------------------------------------------------------------------------------------------------------------------------------------------------------------------------------------------------------------------------------------------------------------------------------------------------------------------------------------------------------------------------------------------------------------------------------------------------------------------------------------------------------------------------------------------------------------------------------------------------------------------------------------------|
|   | sowohl die Integrationskinder als auch die Regelschulkinder von einem getrennten Unterricht profitieren. Dabei könnten wir vielleicht auch sinnvolle getrennte Konzepte entwickeln, die wir an andere Klassenvorstände weitergeben. [1]                                                                                                                                                                                                                                                                                                                                                                                                                                                                                                                                                                                                                                                                                                                                                                                                                                                                                                                                                                                                                                                                                                                                                                                                                                                                                                       |                                                                                                                                                                                                                                                                                                                                                                                                                                                                                                                                                                                                                                                                                                                                                                                                                                                                                                                                                                                                                                                                                                                                                                                                                                                                                                                                                                              |
| 4 | <p><b>An der Schule, an der Sie unterrichten wird für Kinder die Deutsch als zweite Sprache lernen Deutschunterricht nach dem Unterricht auf ehrenamtlicher Basis angeboten. Eine Kollegin, mit der Sie sich gut verstehen fragt Sie nun, ob Sie sich an dem Projekt ehrenamtlich als Lehrer beteiligen möchten.</b></p> <ul style="list-style-type: none"> <li>○ Ich finde das Engagement meiner Kollegin toll und möchte gerne mitmachen. Ich gebe ihr zu verstehen, dass ich Vollzeit arbeite und das mit meinem Stundenplan in Einklang bringen muss. Beim Direktor informiere ich mich, welche staatlichen Projektunterstützungen einbezogen werden können. [4]</li> <li>○ Ich freue mich, dass sie an mich gedacht hat und sage ihr zu. Ich finde es eine tolle Idee und deshalb versuche ich meine Freizeit so zu organisieren, dass ich für das Projekt auch Zeit finde. Vielleicht entwickelt sich daraus ein überregionales Projekt. [3]</li> <li>○ Da ich bereits Vollzeit arbeite weiß ich nicht, wann ich das noch tun soll. Ich sage meiner Kollegin, dass ich mich gefreut habe, dass sie an mich gedacht habe, ich allerdings keine zeitlichen Ressourcen dafür habe. Ich hoffe, sie nimmt mir das nicht übel. [1.5]</li> <li>○ Ich muss ehrlich sagen, dass ich bereits Vollzeit arbeite und meine Freizeit nicht mit Unterrichten verbringen möchte. Ich denke außerdem, dass häufig ein zusätzliches Engagement für die Muttersprachler fehlt und schlage deshalb Förderungen auch in diese Richtung vor. [1.5]</li> </ul> | <p><b>At the school where you teach, language lessons are offered after school on a voluntary basis for children learning the national language as a second language. A colleague, with whom you get along well, asks you if you would like to participate in the project as a volunteer teacher.</b></p> <ul style="list-style-type: none"> <li>○ I think my colleague's engagement is great and would like to participate. I tell her that I have a full-time employment and must arrange my timetable. I ask the director which state project funding can be considered for additional support. [4]</li> <li>○ I am happy that she thought of me, and I tell her that I will do it. I think it's a great idea and that's why I try to organize my free time in such a way that I find time for the project. Maybe it will grow and become cross-regional initiative. [3]</li> <li>○ Since I already have a full-time employment, I don't know when I could do it. I tell my colleague that I am pleased that she thought of me, but I don't have time for it. I hope she won't be upset with me. [1.5]</li> <li>○ I have to say that I already work as a full-time teacher and do not want to spend my free time on teaching. I also think that additional support for native speakers is often lacking and therefore suggest funding in this direction. [1.5]</li> </ul> |
| 5 | <b>Bei einer Lernzielkontrolle erhält ein Integrationskind*, welche Schwierigkeiten mit der Aufmerksamkeit und sozialen Fähigkeiten</b>                                                                                                                                                                                                                                                                                                                                                                                                                                                                                                                                                                                                                                                                                                                                                                                                                                                                                                                                                                                                                                                                                                                                                                                                                                                                                                                                                                                                       | <b>In a learning objective test, a child with special needs* who has difficulties with attention and social skills gets a very good mark. During the break you</b>                                                                                                                                                                                                                                                                                                                                                                                                                                                                                                                                                                                                                                                                                                                                                                                                                                                                                                                                                                                                                                                                                                                                                                                                           |

|   |                                                                                                                                                                                                                                                                                                                                                                                                                                                                                                                                                                                                                                                                                                                                                                                                                                                                                                                                                                                                                                                                                                                                                                                                                                                                                                                                                                                                                                                                                                          |                                                                                                                                                                                                                                                                                                                                                                                                                                                                                                                                                                                                                                                                                                                                                                                                                                                                                                                                                                                                                                                                                                                                                                                                                                                                                                                                     |
|---|----------------------------------------------------------------------------------------------------------------------------------------------------------------------------------------------------------------------------------------------------------------------------------------------------------------------------------------------------------------------------------------------------------------------------------------------------------------------------------------------------------------------------------------------------------------------------------------------------------------------------------------------------------------------------------------------------------------------------------------------------------------------------------------------------------------------------------------------------------------------------------------------------------------------------------------------------------------------------------------------------------------------------------------------------------------------------------------------------------------------------------------------------------------------------------------------------------------------------------------------------------------------------------------------------------------------------------------------------------------------------------------------------------------------------------------------------------------------------------------------------------|-------------------------------------------------------------------------------------------------------------------------------------------------------------------------------------------------------------------------------------------------------------------------------------------------------------------------------------------------------------------------------------------------------------------------------------------------------------------------------------------------------------------------------------------------------------------------------------------------------------------------------------------------------------------------------------------------------------------------------------------------------------------------------------------------------------------------------------------------------------------------------------------------------------------------------------------------------------------------------------------------------------------------------------------------------------------------------------------------------------------------------------------------------------------------------------------------------------------------------------------------------------------------------------------------------------------------------------|
|   | <p><b>hat, eine sehr gute Note. In der Pause hören Sie, wie seine Klassenkameraden ihm zurufen, dass er viel leichtere Aufgaben gehabt habe und viel dümmer sei als sie.</b></p> <ul style="list-style-type: none"> <li>○ Ich werde mit den Kindern gesondert sprechen. Ich maßregele sie, dass sie sich so nicht verhalten dürfen, und werde in einer Unterrichtseinheit die Vorzüge eines integrativen Schulsystems hervorheben, um mehr Verständnis zu schaffen. Mit dem Integrationskind spreche ich über dessen Gefühle zu der Situation und stelle fest, wie er damit umgeht. [4]</li> <li>○ Ich versuche das Integrationskind aus der Situation herauszuholen und tröste es. Ich erkläre ihm, dass die anderen Kinder kein Recht haben, so mit ihm zu sprechen. Ich werde weiter beobachten, ob es nochmals zu solchen Situationen kommt. [3]</li> <li>○ Ich tue so als hätte ich davon nichts mitbekommen, denn das Integrationskind kann so an seinen sozialen Fähigkeiten in schwierigen Situationen arbeiten. Es werden bestimmt immer wieder solche Situationen auftreten, in denen er sich dann selbst behaupten muss. [1]</li> <li>○ Ich spreche in der Klasse an, dass wir eine Integrationsklasse sind und nicht jeder das Gleiche könne. Auch wenn ich persönlich nicht viel von unterschiedlichen Leistungsniveaus in einer Klasse halte, werde ich mir eine Extraaufgabe für die hänselnden Kinder überlegen, weil das eben auch keine Art ist, mit anderen umzugehen. [2]</li> </ul> | <p><b>hear his classmates shouting at him that he received much easier tasks and is much dumber than they are.</b></p> <ul style="list-style-type: none"> <li>○ I will talk to the children separately. I reprimand them that they must not behave like that, and I will emphasize the advantages of an inclusive school system in a lesson to create more understanding. I talk to the integrated child about his feelings regarding the situation and find out how he is dealing with it. [4]</li> <li>○ I try to get the child with special needs out of the situation and comfort him. I explain to him that the other children have no right to speak to him like that. I will continue to observe whether such situations occur again. [3]</li> <li>○ I pretend that I didn't notice because the child with special needs has the chance to improve his social skills in difficult situations. Situations like this will certainly occur again and again, where he will also have to assert himself. [1]</li> <li>○ I remind the class that we are an integrated class and that not everyone has the same abilities. Even though I personally don't think much of different performance levels in a class, I will think of an extra task for the teasing children, because that is no way to deal with others. [2]</li> </ul> |
| 6 | <p><b>An der Schule, an der Sie unterrichten sollen nun Integrationstage eingeführt werden. Dazu soll über die verschiedenen Länder und Kulturen der Schüler und Schülerinnen unterrichtet werden. Bei einer Lehrerkonferenz werden Sie von einem Kollegen gebeten eine Unterrichtseinheit frei zu gestalten, die von den Ähnlichkeiten zwischen Islam und Christentum handelt.</b></p>                                                                                                                                                                                                                                                                                                                                                                                                                                                                                                                                                                                                                                                                                                                                                                                                                                                                                                                                                                                                                                                                                                                  | <p><b>Integration days are supposed to be introduced at the school where you teach. The idea is to teach about the students' different countries and cultures. At a teachers' meeting, you are asked by a colleague to design a lesson about the similarities between Islam and Christianity.</b></p> <ul style="list-style-type: none"> <li>○ I agree to this because I would like to learn more about the topic myself - I</li> </ul>                                                                                                                                                                                                                                                                                                                                                                                                                                                                                                                                                                                                                                                                                                                                                                                                                                                                                             |

|   |                                                                                                                                                                                                                                                                                                                                                                                                                                                                                                                                                                                                                                                                                                                                                                                                                                                                                                                                                                                                                                                                                   |                                                                                                                                                                                                                                                                                                                                                                                                                                                                                                                                                                                                                                                                                                                                                                                                                                                                                                                                                                                                                                              |
|---|-----------------------------------------------------------------------------------------------------------------------------------------------------------------------------------------------------------------------------------------------------------------------------------------------------------------------------------------------------------------------------------------------------------------------------------------------------------------------------------------------------------------------------------------------------------------------------------------------------------------------------------------------------------------------------------------------------------------------------------------------------------------------------------------------------------------------------------------------------------------------------------------------------------------------------------------------------------------------------------------------------------------------------------------------------------------------------------|----------------------------------------------------------------------------------------------------------------------------------------------------------------------------------------------------------------------------------------------------------------------------------------------------------------------------------------------------------------------------------------------------------------------------------------------------------------------------------------------------------------------------------------------------------------------------------------------------------------------------------------------------------------------------------------------------------------------------------------------------------------------------------------------------------------------------------------------------------------------------------------------------------------------------------------------------------------------------------------------------------------------------------------------|
|   | <ul style="list-style-type: none"> <li>○ Ich willige ein, denn ich möchte mich selbst mit dem Thema mehr auseinandersetzen - dementsprechend werde ich hierfür ExpertInnen für beide Religionen zu Rate ziehen. Ich spreche aber auch an, dass es dabei gefährlich sein könnte die Vorstellung von Migranten mit Muslimen gleichzusetzen. [4]</li> <li>○ Ich willige ein, denn ich halte das für ein sehr nachhaltiges Projekt und bereite eine Unterrichtseinheit vor. Es wäre gut, wenn die SchülerInnen sowohl positive wie kritische Punkte aus den beiden Religionen mitnehmen können. [3]</li> <li>○ Ich willige ein und mache die Unterrichtseinheit, auch wenn ich nicht genau weiß, was ich mit dem Islam zu tun habe. Ich werde auch auf die Unterschiede zwischen den Religionen eingehen, die sich herausstellen. [2]</li> <li>○ Ich kenne mich mit dem Islam nicht aus und das steht auch nicht im Lehrplan. Ich schlage vor, dass ich stattdessen Unterricht mit den Kindern machen kann, die an den Integrationstagen sowieso kein Interesse haben. [1]</li> </ul> | <p>will consult experts for both religions accordingly. However, I will also address the fact that it could be dangerous to equate the idea of migrants with being Muslim. [4]</p> <ul style="list-style-type: none"> <li>○ I agree to it because I think this is a very effective project and I will prepare a lesson for it. It would be beneficial if students can learn both positive and critical points about the two religions. [3]</li> <li>○ I agree and do the lesson even though I don't know exactly how Islam and I are connected. I will address the differences between the religions that come up. [2]</li> <li>○ I am not familiar with Islam, and this is not in the teaching plan. I suggest that instead I can do lessons with the children who are not interested in the integration days. [1]</li> </ul>                                                                                                                                                                                                               |
| 7 | <p><b>Sie sind relativ neu an einer AHS*. Im Kollegium hören Sie immer wieder Witze über ausländische Schülerinnen und Schüler. Das Kollegium betont immer wieder, dass dies nur im Scherz gesagt werde. Weder der Rektor noch andere Kolleginnen und Kollegen geben Einwände. In einem Gespräch teilt Ihnen nun eine enge Kollegin mit, dass sie bereits erfolglos versucht hat, etwas gegen die Scherze zu sagen und es nichts bringe mit den jeweiligen Lehrkräften darüber zu sprechen.</b></p> <ul style="list-style-type: none"> <li>○ Ich frage sie was sie davon hält, wenn wir das gemeinsam bei einer der nächsten Besprechungen ansprechen. Ich kann mir gut vorstellen, dass viele Witze von manchen Lehrenden gar nicht sehr ernst gemeint sind, finde es aber dennoch keinen angemessenen Umgang so über Schülerinnen und Schüler zu sprechen. [4]</li> <li>○ Ich sage ihr, dass ich sie verstehe und dass mir diese Sprüche auch</li> </ul>                                                                                                                        | <p><b>You are relatively new at a grammar school*. From time to time, you hear your colleagues making jokes about foreign students. The staff keeps emphasizing that this is only said in jest. Neither the principal nor other colleagues raise any complaints. In a conversation, a close colleague now tells you that she has already tried unsuccessfully to say something against these jokes and that there is no sense in talking to the respective teachers about it.</b></p> <ul style="list-style-type: none"> <li>○ I ask her whether she thinks it would be a good idea if we address this together at the next meeting. I can well imagine that many jokes are not meant very seriously by some teachers, but I still don't think it is appropriate to talk about students in this way. [4]</li> <li>○ I tell her that I understand her and that I have also noticed these comments. However, I think the best way to deal with it is to accept the jokes and to try to not take the statements too seriously. [2.5]</li> </ul> |

|   |                                                                                                                                                                                                                                                                                                                                                                                                                                                                                                                                                                                                                                                                                                                                                                                                                                                                                                                                                                                                                                                                                                                                                                                                                    |                                                                                                                                                                                                                                                                                                                                                                                                                                                                                                                                                                                                                                                                                                                                                                                                                                                                                                                                                                                                                                                                                                                                                                                                                                                                                                                                                                                                                                                             |
|---|--------------------------------------------------------------------------------------------------------------------------------------------------------------------------------------------------------------------------------------------------------------------------------------------------------------------------------------------------------------------------------------------------------------------------------------------------------------------------------------------------------------------------------------------------------------------------------------------------------------------------------------------------------------------------------------------------------------------------------------------------------------------------------------------------------------------------------------------------------------------------------------------------------------------------------------------------------------------------------------------------------------------------------------------------------------------------------------------------------------------------------------------------------------------------------------------------------------------|-------------------------------------------------------------------------------------------------------------------------------------------------------------------------------------------------------------------------------------------------------------------------------------------------------------------------------------------------------------------------------------------------------------------------------------------------------------------------------------------------------------------------------------------------------------------------------------------------------------------------------------------------------------------------------------------------------------------------------------------------------------------------------------------------------------------------------------------------------------------------------------------------------------------------------------------------------------------------------------------------------------------------------------------------------------------------------------------------------------------------------------------------------------------------------------------------------------------------------------------------------------------------------------------------------------------------------------------------------------------------------------------------------------------------------------------------------------|
|   | <p>schon aufgefallen sind. Ich denke allerdings, dass der beste Umgang damit ist, die Witzeleien zu akzeptieren und zu versuchen nicht alle Aussagen zu ernst zu nehmen. [2.5]</p> <ul style="list-style-type: none"> <li>○ Ich zeige meiner Kollegin mein Verständnis, betone aber auch, dass nicht alle Sprüche so ernst genommen werden müssen. Immerhin gibt es auch manchmal witzige Situationen und Lachen ist ja bekanntlich gesund. [2.5]</li> <li>○ Ich schildere meiner Kollegin, dass ich selbst auch manchmal gerne Witze über meine Schüler mache. Mir hilft es dabei Abstand von der Arbeit zu gewinnen. Dass über ausländische Kinder öfter Witze gemacht werden, liegt nicht unbedingt daran, dass sie Ausländer sind. [1]</li> </ul>                                                                                                                                                                                                                                                                                                                                                                                                                                                              | <ul style="list-style-type: none"> <li>○ I show my colleague my understanding, but also emphasize that not all comments have to be taken so seriously. After all, sometimes there are funny situations and laughing is healthy, as we all know. [2.5]</li> <li>○ I tell my colleague that I sometimes like to make jokes about my students. It helps me to gain distance from my work. The fact that jokes are often made about foreign children is not necessarily because they are foreigners. [1]</li> </ul>                                                                                                                                                                                                                                                                                                                                                                                                                                                                                                                                                                                                                                                                                                                                                                                                                                                                                                                                             |
| 8 | <p><b>Sie sind Klassenvorständin einer schwierigen Klasse. In dieser gibt es ein Mädchen, welches den Schulalltag erschwert. Anna sabotiert den Unterricht häufig, indem sie den Klassenraum verlässt oder ausfällig gegenüber Klassenkameraden oder Ihnen wird. Bei der heutigen Besprechung der Hausaufgaben ermahnen Sie das Mädchen zur Ruhe, woraufhin Anna Sie vor der Klasse als „dumme Schlampe“ beschimpft.</b></p> <ul style="list-style-type: none"> <li>○ Ich bin irritiert und spreche das auch gleich mit Anna vor der Klasse an. In einem anschließenden Gespräch weise ich klar darauf hin, dass sie mit niemanden auf diese Art reden kann, versuche aber auch herauszufinden, weshalb sie so reagiert. Ich überlege mir, den Schulpsychologen einzuschalten. Falls sie ihre Strafübung nicht macht, werde ich mit dem Rektor sprechen. [4]</li> <li>○ Ich bin entsetzt von dem Umgangston und versuche in einem Elterngespräch herauszufinden, weshalb Sie sich so verhält. Während des Unterrichts lasse ich sie vor der offenen Klassentür warten. [3]</li> <li>○ Ich gebe Anna eine Strafübung, lasse sie vor der offenen Klassentür warten und fahre mit dem Unterricht fort. Die</li> </ul> | <p><b>You are the class teacher of a difficult class. One girl in particular, Anna, regularly complicates everyday school routines. She often sabotages the lessons by leaving the classroom or being abusive towards classmates or you. During today’s discussion of homework, you remind her to be quiet, whereupon Anna calls you a “stupid bitch” in front of the class.</b></p> <ul style="list-style-type: none"> <li>○ I am irritated and immediately discuss this with Anna in front of the class. In a subsequent conversation, I clarify that she cannot talk to anyone in this way, but also try to find out why she is reacting like this. I consider calling in the school psychologist. If she does not do her punishment exercise, I will talk to the principal. [4]</li> <li>○ I am shocked by the manner in which she is behaving and try to find out in a meeting with the parents why she is behaving like this. During the lesson I make her wait outside the open classroom door. [3]</li> <li>○ I give Anna a punishment exercise, make her wait in front of the open classroom door and continue with the lesson. First and foremost, the other children should learn something today and secondly, they should not think that I can be treated like this. [1.5]</li> <li>○ I call her parents and tell them to pick up their child and that she is suspended for the short-term due to inappropriate behavior. To ensure</li> </ul> |

|   |                                                                                                                                                                                                                                                                                                                                                                                                                                                                                                                                                                                                                                                                                                                                                                                                                                                                                                                                                                                                                                                                                                                                                                                                                                                                                                                                                                                                                                                                                                           |                                                                                                                                                                                                                                                                                                                                                                                                                                                                                                                                                                                                                                                                                                                                                                                                                                                                                                                                                                                                                                                                                                                                                                                                                                                                                                                                                                                                                                                 |
|---|-----------------------------------------------------------------------------------------------------------------------------------------------------------------------------------------------------------------------------------------------------------------------------------------------------------------------------------------------------------------------------------------------------------------------------------------------------------------------------------------------------------------------------------------------------------------------------------------------------------------------------------------------------------------------------------------------------------------------------------------------------------------------------------------------------------------------------------------------------------------------------------------------------------------------------------------------------------------------------------------------------------------------------------------------------------------------------------------------------------------------------------------------------------------------------------------------------------------------------------------------------------------------------------------------------------------------------------------------------------------------------------------------------------------------------------------------------------------------------------------------------------|-------------------------------------------------------------------------------------------------------------------------------------------------------------------------------------------------------------------------------------------------------------------------------------------------------------------------------------------------------------------------------------------------------------------------------------------------------------------------------------------------------------------------------------------------------------------------------------------------------------------------------------------------------------------------------------------------------------------------------------------------------------------------------------------------------------------------------------------------------------------------------------------------------------------------------------------------------------------------------------------------------------------------------------------------------------------------------------------------------------------------------------------------------------------------------------------------------------------------------------------------------------------------------------------------------------------------------------------------------------------------------------------------------------------------------------------------|
|   | <p>anderen Kinder sollen erstens heute noch etwas lernen und zweitens nicht denken, dass man mich so behandeln kann. [1.5]</p> <ul style="list-style-type: none"> <li>○ Ich rufe ihre Eltern an und sage ihnen, dass sie ihr Kind abholen sollen und es erstmal wegen unangemessenen Verhalten suspendiert ist. Damit sie etwas aus ihrem Verhalten lernt müssen harte Konsequenzen folgen. Längerfristig spreche ich mit dem Direktor über die Situation. [1.5]</li> </ul>                                                                                                                                                                                                                                                                                                                                                                                                                                                                                                                                                                                                                                                                                                                                                                                                                                                                                                                                                                                                                               | <p>that she learns something from her behavior, tough consequences must follow. In the longer term, I will talk to the principal about the situation. [1.5]</p>                                                                                                                                                                                                                                                                                                                                                                                                                                                                                                                                                                                                                                                                                                                                                                                                                                                                                                                                                                                                                                                                                                                                                                                                                                                                                 |
| 9 | <p><b>Sie unterrichten an einer NMS*. Eine Klasse mit den verschiedensten Nationalitäten und nur drei Österreichern funktioniert besonders gut und wird immer wieder lobend erwähnt. Bei einer Lehrerkonferenz erfahren Sie nun, dass der zuständige Klassenvorstand mit seiner Klasse sehr viel über verschiedene Kulturen, Religionen und Länder spricht.</b></p> <ul style="list-style-type: none"> <li>○ Ich werde mich bei dem Lehrer informieren, was er für Unterrichtsmaterialien hat. Vielleicht könnte ich daraus etwas verwenden. Außerdem schlage ich vor, dass er für alle Lehrenden seine Unterrichtsmaterialien vorstellen könnte – dann kann sich das Kollegium daran orientieren und möglicherweise weiterentwickeln. [4]</li> <li>○ Ich finde es toll, dass die Klasse so funktioniert und muss sagen, dass das wohl ein gelungenes Beispiel von Integration ist. Vielleicht könnte sich daraus noch ein Vorzeigebispiel entwickeln und ich hoffe, dass vermehrt auf verschiedene Kulturen eingegangen wird. [3]</li> <li>○ Ich muss ganz ehrlich sagen, dass ich das etwas merkwürdig finde. Mittlerweile setzen wir uns nicht mehr unbedingt für den Erhalt unserer Kultur ein – allerdings habe ich nicht das Gefühl, dass ich mit meiner Kritik im Kollegium auf offene Ohren stoßen würde und behalte das deshalb für mich. [1]</li> <li>○ Im Lehrplan steht nicht, dass wir ständig über verschiedene Kulturen, Religionen und Länder sprechen sollten. Ich werde mich</li> </ul> | <p><b>You teach at an intermediate school. A class with various nationalities and just three native pupils works particularly well and is repeatedly complimented. At a teachers' conference, you learn that the teacher in charge of the class talks a lot with his class about different cultures, religions, and countries.</b></p> <ul style="list-style-type: none"> <li>○ I will ask the teacher about his teaching materials. Maybe I could use them as well. I also suggest that he could present his teaching materials to all teachers - then the teaching staff could use these as a reference and potentially develop them further. [4]</li> <li>○ I think it's great that the class works like this and have to say that it's a successful example of integration. Perhaps it could become a role model and hopefully more attention will be paid to different cultures. [3]</li> <li>○ I have to honestly admit that this is kind of strange. Nowadays, we don't necessarily stand up for the protection of our culture - however, I don't have the feeling that my criticism would be appreciated by my colleagues and therefore I keep it to myself. [1]</li> <li>○ The curriculum does not require that we regularly talk about different cultures, religions, and countries. I will continue to follow the curriculum because I want the students to be prepared for the professional workforce in the future. [2]</li> </ul> |



|    |                                                                                                                                                                                                                                                                                                                                                                                                                                                                                                                                                                                                                                                                                                                                                                                                                                                                                                                                                                                                                                                                                                                                            |                                                                                                                                                                                                                                                                                                                                                                                                                                                                                                                                                                                                                                                                                                                                                                                                                                                                                                                                                                                                                                                                                             |
|----|--------------------------------------------------------------------------------------------------------------------------------------------------------------------------------------------------------------------------------------------------------------------------------------------------------------------------------------------------------------------------------------------------------------------------------------------------------------------------------------------------------------------------------------------------------------------------------------------------------------------------------------------------------------------------------------------------------------------------------------------------------------------------------------------------------------------------------------------------------------------------------------------------------------------------------------------------------------------------------------------------------------------------------------------------------------------------------------------------------------------------------------------|---------------------------------------------------------------------------------------------------------------------------------------------------------------------------------------------------------------------------------------------------------------------------------------------------------------------------------------------------------------------------------------------------------------------------------------------------------------------------------------------------------------------------------------------------------------------------------------------------------------------------------------------------------------------------------------------------------------------------------------------------------------------------------------------------------------------------------------------------------------------------------------------------------------------------------------------------------------------------------------------------------------------------------------------------------------------------------------------|
|    | weiterhin an den Lehrplan halten, denn die Schüler sollen anschließend auf dem Arbeitsmarkt wettbewerbsfähig sein. [2]                                                                                                                                                                                                                                                                                                                                                                                                                                                                                                                                                                                                                                                                                                                                                                                                                                                                                                                                                                                                                     |                                                                                                                                                                                                                                                                                                                                                                                                                                                                                                                                                                                                                                                                                                                                                                                                                                                                                                                                                                                                                                                                                             |
| 10 | <p><b>Als Klassenvorständin halten Sie einen Elternabend. Ein Vater mit Migrationshintergrund kommt und begrüßt Sie, schüttelt Ihnen aber nicht die Hand. Er entschuldigt sich sofort respektvoll bei Ihnen und erklärt, dass er aufgrund seiner Religion Frauen nicht die Hand schüttelt.</b></p> <ul style="list-style-type: none"> <li>○ Ich finde es einen reifen und reflektierten Umgang mit seiner Religion und ich fühle mich durch seine Erklärung respektiert. Ich sage ihm, dass ich diese Erklärung wichtig und gut finde, da das sonst zu Missverständnissen führen könnte. [4]</li> <li>○ Da ich seine Religion respektiere, finde ich das nicht weiter problematisch. Deshalb begrüße ich den Herrn einfach freundlich. [3]</li> <li>○ Ich begrüße den Vater freundlich. Ich finde es aber tatsächlich etwas unhöflich, dass er sich nicht an die gesellschaftlichen Regeln anpassen möchte. [2]</li> <li>○ Hände schütteln ist meiner Ansicht nach nichts Tragisches und gehört zu unseren gesellschaftlichen Regeln. Deshalb weise ich ihn darauf hin, dass es in Österreich andere Verhaltensregeln gibt. [1]</li> </ul> | <p><b>As teacher in charge of a class, you organise a parents' evening. A father with a migration background arrives and greets you but does not shake your hand. He immediately apologises to you respectfully and explains that he does not shake hands with women because of his religion.</b></p> <ul style="list-style-type: none"> <li>○ I find it a mature and reflective way of dealing with his religion and I feel respected by his explanation. I tell him that I think this explanation is important and helpful, otherwise this behavior could lead to misunderstandings. [4]</li> <li>○ Since I respect his religion, I do not consider this to be a problem. Therefore, I simply greet the gentleman in a friendly manner. [3]</li> <li>○ I greet the father in a friendly way. However, I think it's kind of rude that he doesn't want to conform to the rules of society. [2]</li> <li>○ Shaking hands is nothing dramatic in my opinion and is part of our social rules. Therefore, I remind him that there are different rules of conduct in our country. [1]</li> </ul> |
| 11 | <p><b>Sie haben zwei sehr schwierige 14-jährige Schülerinnen in Ihrer Klasse. Sie erleben häufig, wie sie sich über andere lustig machen, meist kommen sie zu spät zum Unterricht, manchmal auch gar nicht. Schulaufgaben oder die Schultasche bringen die beiden schon seit einiger Zeit nicht mehr mit in die Schule. Die Kontaktaufnahme mit den alleinerziehenden Müttern hat sich bisher als erfolglos gezeigt, da sie wegen ihrer Arbeit wenig Zeit haben und kein Deutsch beherrschen. Außerdem verweigern die Töchter das Dolmetschen der Gespräche.</b></p>                                                                                                                                                                                                                                                                                                                                                                                                                                                                                                                                                                       | <p><b>You have two very troublesome 14-year-old female students in your class. You frequently see them making fun of others, they usually come late to class, and sometimes not at all. They have not brought their homework or school bags to school for quite a while. Contacting the single mothers has so far proved unsuccessful, as they rarely have time due to their work and do not understand German. In addition, the girls refuse to function as interpreters during the conversations.</b></p> <ul style="list-style-type: none"> <li>○ I will contact the staff and the principal to request an interpreter. This will</li> </ul>                                                                                                                                                                                                                                                                                                                                                                                                                                             |

|           |                                                                                                                                                                                                                                                                                                                                                                                                                                                                                                                                                                                                                                                                                                                                                                                                                                                                                                                                                                                                                                                                                                                                                                                                   |                                                                                                                                                                                                                                                                                                                                                                                                                                                                                                                                                                                                                                                                                                                                                                                                                                                                                                   |
|-----------|---------------------------------------------------------------------------------------------------------------------------------------------------------------------------------------------------------------------------------------------------------------------------------------------------------------------------------------------------------------------------------------------------------------------------------------------------------------------------------------------------------------------------------------------------------------------------------------------------------------------------------------------------------------------------------------------------------------------------------------------------------------------------------------------------------------------------------------------------------------------------------------------------------------------------------------------------------------------------------------------------------------------------------------------------------------------------------------------------------------------------------------------------------------------------------------------------|---------------------------------------------------------------------------------------------------------------------------------------------------------------------------------------------------------------------------------------------------------------------------------------------------------------------------------------------------------------------------------------------------------------------------------------------------------------------------------------------------------------------------------------------------------------------------------------------------------------------------------------------------------------------------------------------------------------------------------------------------------------------------------------------------------------------------------------------------------------------------------------------------|
|           | <ul style="list-style-type: none"> <li>○ Ich werde mich mit dem Kollegium und dem Rektor in Verbindung setzen und auf einen Dolmetscher bestehen. Dies wird einiges an zusätzlichen Aufwand bedeuten, scheint hier aber sehr dringlich. Für weitere Fallarbeit setze ich mich mit dem Schulpsychologen in Verbindung. [4]</li> <li>○ Ich werde mich an dem Verhalten von Kollegen orientieren. Vielleicht hat jemand schon einmal einen ähnlichen Fall erlebt. Ich denke, dass es wichtig ist, dass die Mädchen die Wichtigkeit von einer Schulbildung wieder ernst nehmen. [3]</li> <li>○ Ich werde die Situation weiter beobachten. Vielleicht brauchen die Schülerinnen einfach ihre Zeit, um die Wichtigkeit von Schule wieder anzuerkennen. Es ist unrealistisch, meine ganzen Kapazitäten auf die beiden Mädchen auszurichten, wenn auch die anderen Kinder schulische Unterstützung brauchen. [2]</li> <li>○ Ich denke, dass die beiden gerade genau die Aufmerksamkeit erhalten, die sie mit ihrem Verhalten erzielen wollen. Um diesen Kreislauf zu durchbrechen, spreche ich mich vor dem Direktor für eine Trennung der beiden Mädchen in unterschiedliche Klassen aus. [1]</li> </ul> | <p>require some additional effort, but seems to be very urgent in this case. I will contact the school psychologist for further work on the situation. [4]</p> <ul style="list-style-type: none"> <li>○ I will follow the example of my colleagues. Maybe someone has experienced similar situations before. I think it is important that the students take the importance of school education seriously again. [3]</li> <li>○ I will continue to monitor the situation. Maybe the students just need their time to recognise the importance of school. It is not realistic to focus all my energy on the two girls when the other children also need school support. [2]</li> <li>○ I think that they are getting exactly the attention they want with their behavior. To break this cycle, I suggest to the principal that the two students be separated into different classes. [1]</li> </ul> |
| <p>12</p> | <p><b>Ein Kollege berichtet Ihnen sein Dilemma mit dem österreichischen Schulsystem. Es sei alles auf die Integration von Minderheiten ausgelegt, dabei gäbe es aber die Gefahr, dass österreichische Schüler zu kurz kommen. Deshalb sei es wichtiger, dass sich Migranten als aller erstes auf die Regeln unserer Gesellschaft einlassen.</b></p> <ul style="list-style-type: none"> <li>○ Ich höre mir seine Sorgen an, da ich einen Austausch über unsere Meinungen für sinnvoll halte. Ich schildere ihm, dass für mich Integration nicht nur die Anpassung von Migranten an unsere gesellschaftlichen Regeln bedeutet, sondern auch die Akzeptanz von Unterschiedlichkeit, wenn sinnvolle gesellschaftliche Regeln</li> </ul>                                                                                                                                                                                                                                                                                                                                                                                                                                                               | <p><b>A colleague shares with you his dilemma concerning the education system. Everything is designed for the integration of minorities, but there is a danger that native students will miss out. Therefore, he thinks, it is more important for migrants to adapt to the rules of our society.</b></p> <ul style="list-style-type: none"> <li>○ I listen to his concerns because I think it is useful to exchange our opinions. I tell him that, for me, integration does not only mean the assimilation of migrants to our societal rules, but also the acceptance of differences when meaningful societal rules are followed. [4]</li> <li>○ I agree with him that it is important for the children to engage with the culture in which they currently live and I say that this is exactly our task:</li> </ul>                                                                               |

|    |                                                                                                                                                                                                                                                                                                                                                                                                                                                                                                                                                                                                                                                                                                                                                                                                                                                                                                                                                                                                                                                                                |                                                                                                                                                                                                                                                                                                                                                                                                                                                                                                                                                                                                                                                                                                                                                                                                                                                                                                                                                                                                                                                                                                                                                                                                                                          |
|----|--------------------------------------------------------------------------------------------------------------------------------------------------------------------------------------------------------------------------------------------------------------------------------------------------------------------------------------------------------------------------------------------------------------------------------------------------------------------------------------------------------------------------------------------------------------------------------------------------------------------------------------------------------------------------------------------------------------------------------------------------------------------------------------------------------------------------------------------------------------------------------------------------------------------------------------------------------------------------------------------------------------------------------------------------------------------------------|------------------------------------------------------------------------------------------------------------------------------------------------------------------------------------------------------------------------------------------------------------------------------------------------------------------------------------------------------------------------------------------------------------------------------------------------------------------------------------------------------------------------------------------------------------------------------------------------------------------------------------------------------------------------------------------------------------------------------------------------------------------------------------------------------------------------------------------------------------------------------------------------------------------------------------------------------------------------------------------------------------------------------------------------------------------------------------------------------------------------------------------------------------------------------------------------------------------------------------------|
|    | <p>eingehalten werden. [4]</p> <ul style="list-style-type: none"> <li>○ Ich stimme ihm zu, dass es wichtig ist, dass die Kinder sich auf die Kultur, in der sie aktuell leben, einlassen und gebe zu Bedenken, dass genau das unsere Aufgabe ist: bei diesem Einlassen Hilfestellung zu leisten. [3]</li> <li>○ Ich höre dem Kollegen interessiert zu, sage ihm aber auch, dass es österreichische Kinder nicht schlechter hätten als Minderheiten mit Migrationshintergrund. Allerdings sollte schon darauf geachtet werden, dass Integration nur in Maßen funktionieren kann. [1.5]</li> <li>○ Ich bin sehr interessiert an einem Gespräch, da ich selbst schon darüber nachdenken musste. Ich schlage dem Kollegen deshalb vor, dass wir eine solche Debatte auch mit dem Direktor führen können, um eventuelle Missstände in der Schule zu vermeiden. [1.5]</li> </ul>                                                                                                                                                                                                     | <p>to help them to engage. [3]</p> <ul style="list-style-type: none"> <li>○ I listen to my colleague with interest, but I also tell him that native children do not suffer worse than minorities with a migration background. However, we should pay attention to the fact that integration can only work in moderation. [1.5]</li> <li>○ I am very interested in a discussion because I had already thought about this myself. I therefore suggest that we should also discuss this with the principal in order to avoid possible grievances at school. [1.5]</li> </ul>                                                                                                                                                                                                                                                                                                                                                                                                                                                                                                                                                                                                                                                                |
| 13 | <p><b>An der Schule ist seit neuestem ein blindes Mädchen, Lisa. Die NMS* wurde ausgewählt, da die Schule über Lifts und Infrastruktur für Sehbeeinträchtigungen verfügt. Allerdings hat das gesamte Kollegium keine Erfahrung mit dem Unterrichten von blinden Personen. Seitdem Lisa an der Schule ist, werden ihre Schulleistungen immer schlechter. Sie hat noch keinen Anschluss bei anderen Schülerinnen gefunden. Nun hören Sie während der Pause, wie Schulkameradinnen von Lisa über die „Blindschleiche“ reden, die nicht einmal Treppen benutzen kann.</b></p> <ul style="list-style-type: none"> <li>○ Ich spreche die Mädchen darauf an und betone, dass sie versuchen sollen, sich in Lisas Situation einzufühlen. Im Unterricht bringe ich von nun an inklusive Unterrichtskonzepte ein – auch um mehr Verständnis zu schaffen – und werde beobachten, ob Lisa damit mehr von dem Unterricht mitnimmt. [4]</li> <li>○ Die Wortwahl der Mädchen ist schwierig und ich werde mit ihnen über ihr Fehlverhalten sprechen. Wenn sich die Situation weiter</li> </ul> | <p><b>There is a new blind student, Lisa, at school. The intermediate-level school was chosen as it has elevators and infrastructure for visually impaired people. However, the entire staff has no experience with teaching blind people. Since Lisa has been at the school, her school performance has become increasingly worse. She has not connected with other pupils yet. During the break, you hear Lisa's classmates talking about the "blind worm" who can't even use stairs.</b></p> <ul style="list-style-type: none"> <li>○ I speak to the classmates about this and suggest that they should try to empathise with Lisa's situation. From now on, I introduce inclusive teaching concepts in the lessons - to create more understanding - and will observe whether Lisa benefits more from the lessons as a result. [4]</li> <li>○ The classmates' choice of words is problematic, and I will talk to them about their misbehavior. If the situation continues this way, I will talk to the staff and Lisa's parents about this situation. [3]</li> <li>○ The classmates' choice of words is not correct, but children sometimes talk like this. I have made note of the situation and will continue to monitor</li> </ul> |

|    |                                                                                                                                                                                                                                                                                                                                                                                                                                                                                                                                                                                                                                                                                                                                                                                                                                                                                                                                                                                                                                                                                                                                                                                                                                                                                                                                      |                                                                                                                                                                                                                                                                                                                                                                                                                                                                                                                                                                                                                                                                                                                                                                                                                                                                                                                                                                                                                                                                                                                                                                                                                                                                                                                                                                                                                                                                                                |
|----|--------------------------------------------------------------------------------------------------------------------------------------------------------------------------------------------------------------------------------------------------------------------------------------------------------------------------------------------------------------------------------------------------------------------------------------------------------------------------------------------------------------------------------------------------------------------------------------------------------------------------------------------------------------------------------------------------------------------------------------------------------------------------------------------------------------------------------------------------------------------------------------------------------------------------------------------------------------------------------------------------------------------------------------------------------------------------------------------------------------------------------------------------------------------------------------------------------------------------------------------------------------------------------------------------------------------------------------|------------------------------------------------------------------------------------------------------------------------------------------------------------------------------------------------------------------------------------------------------------------------------------------------------------------------------------------------------------------------------------------------------------------------------------------------------------------------------------------------------------------------------------------------------------------------------------------------------------------------------------------------------------------------------------------------------------------------------------------------------------------------------------------------------------------------------------------------------------------------------------------------------------------------------------------------------------------------------------------------------------------------------------------------------------------------------------------------------------------------------------------------------------------------------------------------------------------------------------------------------------------------------------------------------------------------------------------------------------------------------------------------------------------------------------------------------------------------------------------------|
|    | <p>so entwickelt, werde ich mit dem Kollegium und den Eltern von Lisa über diese Situation sprechen. [3]</p> <ul style="list-style-type: none"> <li>○ Die Wortwahl der Mädchen ist nicht gut, aber Kinder reden manchmal so. Ich habe die Situation registriert und werde weiter beobachten, ob ich weitere schlimme Äußerungen gegen Lisa höre oder ob sie sich irgendwann auch selbst wehren kann. [1.5]</li> <li>○ Ich finde die Wortwahl der Mädchen unangemessen und Lisa hat so etwas nicht verdient. Wegen des Leistungsabfalls werde ich den Direktor informieren, damit sie wieder auf eine Schule kommt, die auf ihre Bedürfnisse zugeschnitten ist und sie leichter Anschluss finden kann. [1.5]</li> </ul>                                                                                                                                                                                                                                                                                                                                                                                                                                                                                                                                                                                                               | <p>whether I hear any further negative remarks against Lisa or whether she will eventually be able to defend herself. [1.5]</p> <ul style="list-style-type: none"> <li>○ I find the classmates' choice of words inappropriate, and Lisa does not deserve such treatment. Because of the decrease in performance, I will inform the principal to arrange for her to go to another school that is tailored to her needs and that can enable her to make connections more easily. [1.5]</li> </ul>                                                                                                                                                                                                                                                                                                                                                                                                                                                                                                                                                                                                                                                                                                                                                                                                                                                                                                                                                                                                |
| 14 | <p><b>Seit kurzem unterrichten Sie an einer NMS* in der im Kollegium viel über eine Problemklasse gesprochen wird. Die meisten Kinder der Klasse kommen aus schwierigen sozialen Verhältnissen, außerdem haben einige Schüler und Schülerinnen ein Attest der Schulpsychologin als verhaltensauffällige Kinder mit besonderem Förderbedarf*. Bei einem Grillfest mit dem Kollegium erfahren Sie, dass die Klasse so zusammengestellt wurde, um die anderen Klassen nicht mit Problemschülern zu beeinträchtigen.</b></p> <ul style="list-style-type: none"> <li>○ Ich bin schockiert und das zeige ich. Für mich bedeuten integrative Maßnahmen nicht die Absonderung durch unterschiedliche Klassengemeinschaften. Ich werde mich dafür einsetzen, dass diese Klasse wieder durchmischer ist. [4]</li> <li>○ Ich kann die Entscheidung nicht ganz verstehen. Allerdings möchte ich noch weiter beobachten, ob dieser Weg mit Problemschülern umzugehen nicht doch sinnvoll ist und meine Kollegen diese Entscheidung durch deren Expertise getroffen haben. [3]</li> <li>○ Das ist ein interessanter Ansatz. Somit können die Schüler, die wirklich etwas lernen wollen wieder aktiv im Unterricht etwas lernen. Außerdem bedeutet das für die Lehrenden eine gleichmäßigere Belastung. Eine solche Herangehensweise ist</li> </ul> | <p><b>You have recently started teaching at an intermediate school in which the staff talks a lot about a difficult class. Most of the children in the class come from difficult social backgrounds; in addition, some of the students have a certificate from the school psychologist indicating that they are children with behavioral problems and special needs. At a barbecue with the staff, you learn that the class was put together in this way so that other classes would not be affected by difficult students.</b></p> <ul style="list-style-type: none"> <li>○ I am shocked and I express this. For me, inclusive education does not mean segregation between different class communities. I will work to make this class more inclusive again. [4]</li> <li>○ I cannot fully understand the decision. However, I would like to observe whether this way of dealing with difficult students is useful and whether my colleagues have made this decision based on their expertise. [3]</li> <li>○ This is an interesting approach. This way, the students who really want to learn something can actively learn something without interruptions. It also means a more balanced workload for the teachers. Such an approach is sometimes necessary. [2]</li> <li>○ The idea is interesting. I have also thought that some of my students should be taught separately. I immediately ask the teachers if they would be willing to teach the students I have in mind. [1]</li> </ul> |

|    |                                                                                                                                                                                                                                                                                                                                                                                                                                                                                                                                                                                                                                                                                                                                                                                                                                                                                                                                                                                                                                                                                                                                                                                                                                                                                                                                                                                                                                                                                                                                       |                                                                                                                                                                                                                                                                                                                                                                                                                                                                                                                                                                                                                                                                                                                                                                                                                                                                                                                                                                                                                                                                                                                                                                                                                                                                                                                                                                                                            |
|----|---------------------------------------------------------------------------------------------------------------------------------------------------------------------------------------------------------------------------------------------------------------------------------------------------------------------------------------------------------------------------------------------------------------------------------------------------------------------------------------------------------------------------------------------------------------------------------------------------------------------------------------------------------------------------------------------------------------------------------------------------------------------------------------------------------------------------------------------------------------------------------------------------------------------------------------------------------------------------------------------------------------------------------------------------------------------------------------------------------------------------------------------------------------------------------------------------------------------------------------------------------------------------------------------------------------------------------------------------------------------------------------------------------------------------------------------------------------------------------------------------------------------------------------|------------------------------------------------------------------------------------------------------------------------------------------------------------------------------------------------------------------------------------------------------------------------------------------------------------------------------------------------------------------------------------------------------------------------------------------------------------------------------------------------------------------------------------------------------------------------------------------------------------------------------------------------------------------------------------------------------------------------------------------------------------------------------------------------------------------------------------------------------------------------------------------------------------------------------------------------------------------------------------------------------------------------------------------------------------------------------------------------------------------------------------------------------------------------------------------------------------------------------------------------------------------------------------------------------------------------------------------------------------------------------------------------------------|
|    | <p>manchmal notwendig. [2]</p> <ul style="list-style-type: none"> <li>○ Die Idee ist interessant. Ich dachte mir auch schon bei ein paar Schülern, die ich unterrichte, dass die separat unterrichtet werden sollten. Ich schlage den Lehrern gleich vor, ob sie die Schüler, die mir einfallen auch mit in die Klasse nehmen wollen. [1]</li> </ul>                                                                                                                                                                                                                                                                                                                                                                                                                                                                                                                                                                                                                                                                                                                                                                                                                                                                                                                                                                                                                                                                                                                                                                                  |                                                                                                                                                                                                                                                                                                                                                                                                                                                                                                                                                                                                                                                                                                                                                                                                                                                                                                                                                                                                                                                                                                                                                                                                                                                                                                                                                                                                            |
| 15 | <p><b>Sie erhalten einen Anruf von den Eltern eines Mädchens, welches im Schwimmunterricht derzeit immer krankgemeldet ist. In gebrochenem Deutsch erklären die Eltern, dass sie aufgrund ihrer Religion und dem Alter ihrer Tochter nicht mehr möchten, dass Sie am Schwimmunterricht teilnimmt. Allerdings ist der Schwimmunterricht an österreichischen Schulen für alle Schüler verpflichtend.</b></p> <ul style="list-style-type: none"> <li>○ Ich versuche den Eltern mein Verständnis für ihre Religion entgegenzubringen und gleichzeitig die österreichische Unterrichtspflicht darzustellen. Ich schlage ihnen vor, gemeinsam mit ihrer Tochter über ihre Wünsche zu sprechen und dass es Möglichkeiten, wie beispielsweise Burkinis gibt. [4]</li> <li>○ Ich zeige ihnen mein Verständnis für ihre Religion. Da ich nicht weiß, ob irgendwelche Ausnahmen gemacht werden können, verweise ich sie auf den Direktor, damit er das mit ihnen klären kann bzw. bei anderen Schulen nachfragen kann. [3]</li> <li>○ Ich sage den Eltern, dass es auch Burkinis gibt und sie ihrer Tochter einen solchen kaufen sollen. Bis dahin werde ich aber nichts unternehmen, denn ich denke nicht, dass ihre Tochter so dringend am Schwimmunterricht teilnehmen muss. [2]</li> <li>○ Die Religion darf in keinem Fall zu einem Ausschluss aus dem Schwimmunterricht führen. Ich sage ihnen, dass sie ihre Tochter zum Unterricht schicken müssen, da sich sonst eventuell Sozialämter in die Angelegenheit einschalten. [1]</li> </ul> | <p><b>You receive a call from the parents of a student who is regularly absent from swimming lessons. In broken German, the parents explain that based on their religion and the age of their daughter, they do not want her to attend swimming lessons anymore. However, swimming lessons are compulsory for all school attendees.</b></p> <ul style="list-style-type: none"> <li>○ I try to express my understanding for the parents' religion and at the same time present the compulsory nature of the lessons. I suggest that they talk to their daughter about her wishes and that there are possibilities, such as burkinis. [4]</li> <li>○ I demonstrate to them my understanding of their religion. As I do not know whether any exceptions can be made, I refer them to the principal so that he can clarify this with them or ask at other schools about how to handle this situation. [3]</li> <li>○ I tell the parents that there are also burkinis and that they should buy one for their daughter. Until then, however, I will not do anything because I do not think that their daughter needs to attend swimming lessons so urgently. [2]</li> <li>○ Under no circumstances should religion lead to an exclusion from swimming lessons. I tell them that they must send their daughter to swimming lessons, otherwise the social services may get involved in this matter. [1]</li> </ul> |

|           |                                                                                                                                                                                                                                                                                                                                                                                                                                                                                                                                                                                                                                                                                                                                                                                                                                                                                                                                                                                                                                                                                                                                                                                                                                                                                                                                                                                                                                                                                                                                                                                                                                   |                                                                                                                                                                                                                                                                                                                                                                                                                                                                                                                                                                                                                                                                                                                                                                                                                                                                                                                                                                                                                                                                                                                                                                                                                                                                                                                                                                                                                                                                                                                                                                           |
|-----------|-----------------------------------------------------------------------------------------------------------------------------------------------------------------------------------------------------------------------------------------------------------------------------------------------------------------------------------------------------------------------------------------------------------------------------------------------------------------------------------------------------------------------------------------------------------------------------------------------------------------------------------------------------------------------------------------------------------------------------------------------------------------------------------------------------------------------------------------------------------------------------------------------------------------------------------------------------------------------------------------------------------------------------------------------------------------------------------------------------------------------------------------------------------------------------------------------------------------------------------------------------------------------------------------------------------------------------------------------------------------------------------------------------------------------------------------------------------------------------------------------------------------------------------------------------------------------------------------------------------------------------------|---------------------------------------------------------------------------------------------------------------------------------------------------------------------------------------------------------------------------------------------------------------------------------------------------------------------------------------------------------------------------------------------------------------------------------------------------------------------------------------------------------------------------------------------------------------------------------------------------------------------------------------------------------------------------------------------------------------------------------------------------------------------------------------------------------------------------------------------------------------------------------------------------------------------------------------------------------------------------------------------------------------------------------------------------------------------------------------------------------------------------------------------------------------------------------------------------------------------------------------------------------------------------------------------------------------------------------------------------------------------------------------------------------------------------------------------------------------------------------------------------------------------------------------------------------------------------|
| <p>16</p> | <p><b>Nach dem ein, in die Klassengemeinschaft eher schlecht eingebundenes, Integrationskind* grundlos eine Schlägerei begonnen hat, wird über die Konsequenzen nachgedacht. Unter anderem steht zur Debatte, dass das Kind nicht mehr am Schulfest teilnehmen darf. Beim Schulfest wirkt er auf zwei Veranstaltungen mit und hat sich darauf vorbereitet. Vom Kollegium wird Ihnen vermittelt, dass es für alle die angenehmste Lösung sei, ihn nicht am Schulfest teilnehmen zu lassen.</b></p> <ul style="list-style-type: none"> <li>○ Ich glaube nicht, dass es die richtige Strategie ist den Jungen noch weiter zu isolieren. Stattdessen leite ich ein Gespräch nach der Schule in die Wege, in dem er mir seine Gründe für sein Verhalten erklärt. Dabei versuche ich zusätzlich Situationen herauszufinden, in denen er nicht aggressiv reagiert, um diese zu verstärken. [4]</li> <li>○ Ich glaube, dass der Junge durch sein Verhalten nur Aufmerksamkeit auf sich ziehen wollte. Wir sollten das nicht noch weiter unterstützen, indem wir ihn vom Schulfest ausschließen. [3]</li> <li>○ Ich stimme meinen Kollegen zu, dass wir sein Verhalten nicht durchgehen lassen können und wir ihn nicht am Schulfest teilnehmen lassen sollten. Das Kollegium hat bei solchen Entscheidungen auch schon einige Erfahrung. [2]</li> <li>○ Ich stimme meinen Kollegen zu. Immerhin muss er für das Verhalten auch spürbar negative Konsequenzen erhalten. Außerdem würde seine Teilnahme am Schulfest vermutlich eine schlechte Stimmung auslösen und dementsprechend Mehraufwand für die Lehrenden bedeuten. [1]</li> </ul> | <p><b>After an integrated child, who is rather poorly connected with the class community, started a fight for no reason, the consequences are being determined. Among other things, it is discussed that the child will no longer be allowed to participate in the school festival. At the school festival, it was planned that he be involved in two events and he has prepared himself for them. You are told by the staff that not allowing him to participate in the school festival is the most appropriate solution for everyone.</b></p> <ul style="list-style-type: none"> <li>○ I don't think that isolating the boy even further is the right strategy. Instead, I initiate a conversation with him after school in which he explains the reasons for his behavior. In addition, I try to find situations in which he does not react aggressively, in order to reinforce them. [4]</li> <li>○ I believe that the boy only wanted to draw attention to himself through his behavior. We should not reinforce this by excluding him from the school festival. [3]</li> <li>○ I agree with my colleagues that we cannot let his behavior pass and that we should not let him participate in the school festival. The staff already has some experience in making such decisions. [2]</li> <li>○ I agree with my colleagues. After all, he must also receive noticeable negative consequences for his behavior. In addition, his participation in the school festival would probably cause a bad atmosphere and lead to extra work for the teachers. [1]</li> </ul> |
| <p>17</p> | <p><b>Die Klasse 1a und 1c der neuen Mittelschule, an der Sie Lehrer sind, wird im Turnen gemeinsam unterrichtet. Die Klasse 1a hat einen sehr hohen Migrationsanteil, die Klasse 1c nicht. Ein Schüler aus der Klasse 1a kommt niedergeschlagen auf Sie zu und berichtet von</b></p>                                                                                                                                                                                                                                                                                                                                                                                                                                                                                                                                                                                                                                                                                                                                                                                                                                                                                                                                                                                                                                                                                                                                                                                                                                                                                                                                             | <p><b>Class "1a" and "1c" of the intermediate school where you teach are jointly taught during physical education. Class "1a" has a very high proportion of immigrants, class "1c" does not. A student from class "1a" comes up to you dejectedly and reports an incident that has just happened. After gym class,</b></p>                                                                                                                                                                                                                                                                                                                                                                                                                                                                                                                                                                                                                                                                                                                                                                                                                                                                                                                                                                                                                                                                                                                                                                                                                                                |

|           |                                                                                                                                                                                                                                                                                                                                                                                                                                                                                                                                                                                                                                                                                                                                                                                                                                                                                                                                                                                                                                                                                                                                                                                                                                                                                                                                                                                                                                      |                                                                                                                                                                                                                                                                                                                                                                                                                                                                                                                                                                                                                                                                                                                                                                                                                                                                                                                                                                                                                                                                                                                                                                                                                                                                                                      |
|-----------|--------------------------------------------------------------------------------------------------------------------------------------------------------------------------------------------------------------------------------------------------------------------------------------------------------------------------------------------------------------------------------------------------------------------------------------------------------------------------------------------------------------------------------------------------------------------------------------------------------------------------------------------------------------------------------------------------------------------------------------------------------------------------------------------------------------------------------------------------------------------------------------------------------------------------------------------------------------------------------------------------------------------------------------------------------------------------------------------------------------------------------------------------------------------------------------------------------------------------------------------------------------------------------------------------------------------------------------------------------------------------------------------------------------------------------------|------------------------------------------------------------------------------------------------------------------------------------------------------------------------------------------------------------------------------------------------------------------------------------------------------------------------------------------------------------------------------------------------------------------------------------------------------------------------------------------------------------------------------------------------------------------------------------------------------------------------------------------------------------------------------------------------------------------------------------------------------------------------------------------------------------------------------------------------------------------------------------------------------------------------------------------------------------------------------------------------------------------------------------------------------------------------------------------------------------------------------------------------------------------------------------------------------------------------------------------------------------------------------------------------------|
|           | <p><b>einem gerade geschehenen Vorfall. Nach dem Turnunterricht sei ein Schüler der 1c zu den Buben aus der 1a gekommen und habe sie beschimpft: „Ihr Ausländer, ihr gehört alle zurück, wo ihr herkommt“ und ließ einige beleidigende Worte über ihre Mütter fallen.</b></p> <ul style="list-style-type: none"> <li>○ Ich werde sofort mit dem Schüler aus der 1c sprechen und ihn dazu auffordern sich gebührend zu entschuldigen. Ich möchte auch verstehen, welche Vorbehalte er gegen Ausländer hat. Um Vorbehalte abzubauen, schlage ich dem anderen Klassenvorstand vor, häufiger Unterricht gemeinsam zu gestalten. [4]</li> <li>○ Ich sage dem ausländischen Jungen, dass diese Anschuldigungen nicht okay sind und er sich das nicht gefallen lassen braucht. Mit dem Klassenvorstand der 1c werde ich besprechen, welche Sanktionen das für den Jungen der 1c zur Folge hat. [2.5]</li> <li>○ Ich bin entrüstet von dem Umgangston und spreche mit dem Jungen, dass er sich diese Anschuldigungen nicht zu sehr zu Herzen nehmen dürfe. Ich berichte dem Klassenvorstand der 1c von dem schwierigen Verhalten seines Schülers. [2.5]</li> <li>○ Ich bin von dem Umgangston entrüstet, kann mir aber vorstellen, dass das heutzutage schon ein normaler Ton unter Kindern ist. Deshalb sage ich den Kindern der 1a, dass sie sich solche Aussagen nicht zu Herzen nehmen und besser nicht reagieren sollen. [1]</li> </ul> | <p><b>a student from class "1c" came up to the boys from class "1a" and yelled at them, "You foreigners, you all belong back where you came from" and said some insulting words about their mothers.</b></p> <ul style="list-style-type: none"> <li>○ I will immediately speak to the student from "1c" and ask him to apologise properly. I also want to understand what prejudices he has against foreigners. To reduce prejudices, I suggest to the other class teacher that we should have more frequent lessons together. [4]</li> <li>○ I tell the foreign boy that these attacks are not acceptable and that he does not have to tolerate them. I will discuss with the teacher in class "1c" what consequences this will have for the student in class "1c". [2.5]</li> <li>○ I am shocked by the way the boys were treated and tell the student who came to me that he should not take these statements seriously. I report the difficult behavior of student to the class teacher of "1c". [2.5]</li> <li>○ I am shocked by the way the boy behaved, but I can imagine that this has become normal behavior among children nowadays. Therefore, I tell the children of "1a" that they should not take such statements personally and that they are better off not reacting. [1]</li> </ul> |
| <p>18</p> | <p><b>Sie unterrichten an einer NMS*. Unter anderem betreuen Sie ein Kind, David, das von seinen Eltern schwer vernachlässigt wurde, schulisch nicht unterstützt wird und insgesamt aus einem instabilen Familienverhältnis kommt. David ist verhaltensauffällig* – er schlägt häufig um sich, wird plötzlich aufbrausend und laut, beschimpft sowohl Lehrkräfte als auch Schulkollegen. Für dieses Schuljahr steht eine Klassenfahrt an und nun wird im Kollegium</b></p>                                                                                                                                                                                                                                                                                                                                                                                                                                                                                                                                                                                                                                                                                                                                                                                                                                                                                                                                                           | <p><b>You teach at an intermediate school. Among other things, you look after a child, David, who has been severely neglected by his parents, is not supported at home with schoolwork, and comes from a generally unstable family background. David has behavioral problems - he often strikes out, suddenly becomes violent and loud, and insults teachers as well as schoolmates. A class trip is planned for this school year and now the staff is discussing whether David should be allowed to go.</b></p>                                                                                                                                                                                                                                                                                                                                                                                                                                                                                                                                                                                                                                                                                                                                                                                     |

|           |                                                                                                                                                                                                                                                                                                                                                                                                                                                                                                                                                                                                                                                                                                                                                                                                                                                                                                                                                                                                                                                                                                                                                                                                                            |                                                                                                                                                                                                                                                                                                                                                                                                                                                                                                                                                                                                                                                                                                                                                                                                                                                                                                                                                                                                                                                             |
|-----------|----------------------------------------------------------------------------------------------------------------------------------------------------------------------------------------------------------------------------------------------------------------------------------------------------------------------------------------------------------------------------------------------------------------------------------------------------------------------------------------------------------------------------------------------------------------------------------------------------------------------------------------------------------------------------------------------------------------------------------------------------------------------------------------------------------------------------------------------------------------------------------------------------------------------------------------------------------------------------------------------------------------------------------------------------------------------------------------------------------------------------------------------------------------------------------------------------------------------------|-------------------------------------------------------------------------------------------------------------------------------------------------------------------------------------------------------------------------------------------------------------------------------------------------------------------------------------------------------------------------------------------------------------------------------------------------------------------------------------------------------------------------------------------------------------------------------------------------------------------------------------------------------------------------------------------------------------------------------------------------------------------------------------------------------------------------------------------------------------------------------------------------------------------------------------------------------------------------------------------------------------------------------------------------------------|
|           | <p><b>diskutiert, ob David mitfahren darf.</b></p> <ul style="list-style-type: none"> <li>○ Ich finde es sehr wichtig, dass David die Möglichkeit zur Teilnahme bekommt. Deshalb werde ich mich dafür einsetzen, dass eine zusätzliche Betreuungsperson hinzugezogen wird, auch wenn dies für mich einen Mehraufwand an Formalitäten bedeutet. [4]</li> <li>○ Da das neue Schuljahr erst begonnen hat und wir Davids derzeitigen Zustand noch nicht kennen denke ich, dass wir vorerst abwarten sollten. Wenn David sich wieder danebenbenimmt, darf er nicht mehr mitfahren, denn aus dieser Konsequenz kann er auch etwas lernen. [3]</li> <li>○ David hat schon viel durchgemacht und eine Teilnahme an der Fahrt wird ihn wahrscheinlich noch mehr in eine Überforderung bringen. Deshalb sollte David nicht mitfahren und währenddessen in einer anderen Klasse an seinen Schwierigkeiten arbeiten. [2]</li> <li>○ Ich setze mich dafür ein, dass David nicht mitfährt. Schließlich würde er die Klassenfahrt erschweren und die anderen Kinder behindern, da sie auf David Rücksicht nehmen müssten. Möglicherweise kann er währenddessen gesondert in der Schule an seinen Schwierigkeiten arbeiten. [1]</li> </ul> | <ul style="list-style-type: none"> <li>○ I think it is very important that David gets the opportunity to participate. Therefore, I will make sure that an additional supervisor is involved, even if this means additional paperwork for me. [4]</li> <li>○ Since the new school year has just started and we do not yet know of David's current condition, I think we should wait and observe. If David misbehaves again, he will not be allowed to go on the trip, because he can also learn something from this consequence. [3]</li> <li>○ David has already been through a lot and taking part in the trip will probably overwhelm him even more. Therefore, David should not go on the trip and instead should work on his difficulties in another class. [2]</li> <li>○ I advocate that David should not go on the trip. After all, he would make the class trip more difficult and hinder the other children because they would have to take David into consideration. Maybe he can work on his difficulties individually at school. [1]</li> </ul> |
| <p>19</p> | <p><b>An der NMS* an der Sie unterrichten, ist zu Beginn und zum Ende des Schuljahrs ein Schulgottesdienst. An der NMS* gibt es immer weniger katholische Schulkinder. Der Pfarrer der Gemeinde weigert sich, einen ökumenischen Gottesdienst zu planen und erlaubt nur den katholischen Kindern der Schule zu dem Schulgottesdienst zu kommen. In einer Lehrkonferenz wird nun geklärt, wie damit umgegangen wird.</b></p> <ul style="list-style-type: none"> <li>○ Mich interessiert, weshalb er sich so entschieden hat, und deshalb versuche ich ein Gespräch mit dem Pfarrer in die Wege zu leiten. Generell bin ich aber der Meinung, dass die Schule eine</li> </ul>                                                                                                                                                                                                                                                                                                                                                                                                                                                                                                                                                | <p><b>At the intermediate school where you teach, there is a school religious service at the beginning and at the end of the school year. There are decreasing numbers of Catholic schoolchildren at the school. The parish priest refuses to plan an ecumenical service and will only permit the Catholic children of the school to come to the school service. A teachers conference will be held to clarify how this should be dealt with.</b></p> <ul style="list-style-type: none"> <li>○ I am interested as to why the priest made this decision and therefore I am trying to initiate a conversation with him. However, I generally think that the school should have a joint celebration - perhaps a school celebration at our school in the assembly hall. [4]</li> </ul>                                                                                                                                                                                                                                                                          |



|           |                                                                                                                                                                                                                                                                                                                                                                                                                                                                                                                                                                                                                                                                                                                                                                                                                                                                                                                                                                                                                                                                                                                                                                                                     |                                                                                                                                                                                                                                                                                                                                                                                                                                                                                                                                                                                                                                                                                                                                                                                                                                                                                                                                                                                                                                                                                                                                                                                                                                                                                                                              |
|-----------|-----------------------------------------------------------------------------------------------------------------------------------------------------------------------------------------------------------------------------------------------------------------------------------------------------------------------------------------------------------------------------------------------------------------------------------------------------------------------------------------------------------------------------------------------------------------------------------------------------------------------------------------------------------------------------------------------------------------------------------------------------------------------------------------------------------------------------------------------------------------------------------------------------------------------------------------------------------------------------------------------------------------------------------------------------------------------------------------------------------------------------------------------------------------------------------------------------|------------------------------------------------------------------------------------------------------------------------------------------------------------------------------------------------------------------------------------------------------------------------------------------------------------------------------------------------------------------------------------------------------------------------------------------------------------------------------------------------------------------------------------------------------------------------------------------------------------------------------------------------------------------------------------------------------------------------------------------------------------------------------------------------------------------------------------------------------------------------------------------------------------------------------------------------------------------------------------------------------------------------------------------------------------------------------------------------------------------------------------------------------------------------------------------------------------------------------------------------------------------------------------------------------------------------------|
|           | <p>gemeinsame Feierlichkeit haben sollte – vielleicht eine Schulfeier bei uns in der Aula. [4]</p> <ul style="list-style-type: none"> <li>○ Ich kann die Entscheidung des Pfarrers nicht verstehen, aber akzeptieren. Jedoch möchte ich im Kollegium anregen, dass die nichtkatholischen Kinder auch eine Feier bekommen. [3]</li> <li>○ Ich bin mit dem katholischen Gottesdienst einverstanden, damit die anderen nichtkatholischen Schulkinder keinen Nachteil haben, könnten wir mit ihnen Eis essen gehen. [2]</li> <li>○ Es ist mir wichtig, dass wir auch die katholischen Gepflogenheiten beibehalten. Deshalb sollten wir die katholischen Kinder weiterhin in den Gottesdienst schicken. Mit den Kindern anderen Glaubens können wir stattdessen Schule machen. So haben beide etwas davon. [1]</li> </ul>                                                                                                                                                                                                                                                                                                                                                                                | <ul style="list-style-type: none"> <li>○ I cannot understand the priest's decision, yet I can accept it. However, I would like to suggest to the staff that the non-Catholic children should also have a celebration. [3]</li> <li>○ I agree with the Catholic service, however, to avoid any disadvantage for the other non-Catholic school children, we could go out for ice cream with them. [2]</li> <li>○ It is important to me that we also keep the Catholic customs. Therefore, we should continue to send the Catholic children to church services. The children of other faiths can be taught at school instead. That way they both benefit from it. [1]</li> </ul>                                                                                                                                                                                                                                                                                                                                                                                                                                                                                                                                                                                                                                                |
| <p>20</p> | <p><b>Sie sind Klassenvorstand einer schwierigen Klasse. Es gibt einen Jungen mit Migrationshintergrund, der den Unterricht komplett sabotiert. Viele seiner Verwandten sind vorbestraft oder waren bereits im Gefängnis wegen verschiedener Delikte (Drogenhandel etc.). Sie sprechen ihn nun auf seine nicht vorhandenen schulischen Leistungen an und dass es daher mit einem Schulabschluss schlecht aussieht. Er antwortet Ihnen, dass ihm die Schule eh egal sei und er sowieso ins Gefängnis gehe, wie alle Ausländer.</b></p> <ul style="list-style-type: none"> <li>○ Ich zeige ihm, dass mir seine Erfahrungen leidtun, aber sage klar, dass nicht alle Ausländer ins Gefängnis gehen. Ich werde verstärkt versuchen, Interesse an Wissen zu fördern. Außerdem informiere ich die Schulpsychologin, um gemeinsam Konzepte und Perspektiven für ihn zu schaffen. [4]</li> <li>○ Ich sage ihm, dass mir seine Erfahrungen leidtun, dass aber nicht alle Ausländer ins Gefängnis gehen. Ich hoffe, dass er Möglichkeiten findet, nicht die 17gleichen Perspektiven zu haben wie seine Verwandten. Meinen Unterricht werde ich möglichst auch für ihn ansprechender gestalten. [3]</li> </ul> | <p><b>You are the class teacher in charge of a difficult class. There is one boy with a migration background who completely sabotages the lessons. Many of his relatives have criminal records or have already been in prison for various offences (drug dealing, etc.). You now talk to him about his non-existent school performance and that it thus seems doubtful that he will graduate from school. He answers that he doesn't care about school and that he is going to prison anyway, like all foreigners.</b></p> <ul style="list-style-type: none"> <li>○ I demonstrate to him that I am sorry about his experiences but tell him clearly that not all foreigners go to prison. I will try harder to promote his interest in knowledge. I also inform the school psychologist to jointly create concepts and perspectives for him. [4]</li> <li>○ I tell him that I am sorry about his experiences, but that not all foreigners go to prison. I hope that he will find ways to not have the same perspectives as his relatives. I will also make my lessons as appealing to him as possible. [3]</li> <li>○ I make it clear to him that he must work hard to graduate and that he needs discipline for his professional life in the future. He should not rely on the experiences of his relatives. [2]</li> </ul> |

|    |                                                                                                                                                                                                                                                                                                                                                                                                                                                                                                                                                                                                                                                                                                                                                                                                                                                                                                                                                                                                                                                                                                                                                                                                                                                                                                                                                                                                                                       |                                                                                                                                                                                                                                                                                                                                                                                                                                                                                                                                                                                                                                                                                                                                                                                                                                                                                                                                                                                                                                                                                                                                                                                                                                                                                                                                                                                                                                                                                |
|----|---------------------------------------------------------------------------------------------------------------------------------------------------------------------------------------------------------------------------------------------------------------------------------------------------------------------------------------------------------------------------------------------------------------------------------------------------------------------------------------------------------------------------------------------------------------------------------------------------------------------------------------------------------------------------------------------------------------------------------------------------------------------------------------------------------------------------------------------------------------------------------------------------------------------------------------------------------------------------------------------------------------------------------------------------------------------------------------------------------------------------------------------------------------------------------------------------------------------------------------------------------------------------------------------------------------------------------------------------------------------------------------------------------------------------------------|--------------------------------------------------------------------------------------------------------------------------------------------------------------------------------------------------------------------------------------------------------------------------------------------------------------------------------------------------------------------------------------------------------------------------------------------------------------------------------------------------------------------------------------------------------------------------------------------------------------------------------------------------------------------------------------------------------------------------------------------------------------------------------------------------------------------------------------------------------------------------------------------------------------------------------------------------------------------------------------------------------------------------------------------------------------------------------------------------------------------------------------------------------------------------------------------------------------------------------------------------------------------------------------------------------------------------------------------------------------------------------------------------------------------------------------------------------------------------------|
|    | <ul style="list-style-type: none"> <li>○ Ich mache ihm deutlich, dass er sich für seinen Schulabschluss anstrengen muss und Disziplin für das spätere Berufsleben braucht. Er darf sich nicht auf den Erfahrungen seiner Verwandten ausruhen. [2]</li> <li>○ Ehrlich gesagt hört sich das bei ihm nach einer realistischen Einschätzung aus. Freundlich versuche ich ihm klar zu machen, dass er ohne einen Schulabschluss später auf dem legalen Arbeitsmarkt tatsächlich Schwierigkeiten haben wird und sich deshalb nun anstrengen muss. [1]</li> </ul>                                                                                                                                                                                                                                                                                                                                                                                                                                                                                                                                                                                                                                                                                                                                                                                                                                                                            | <ul style="list-style-type: none"> <li>○ To be honest, this sounds like a realistic result in his case. I try to kindly make it clear to him that without graduating, he will indeed have difficulties later in the legal employment sector and therefore must make an effort now. [1]</li> </ul>                                                                                                                                                                                                                                                                                                                                                                                                                                                                                                                                                                                                                                                                                                                                                                                                                                                                                                                                                                                                                                                                                                                                                                              |
| 21 | <p><b>In einer Problemklasse die Sie unterrichten fällt auf, dass vor allem Kinder, die aus einem bildungsfernen Umfeld kommen und wenig Rückhalt von den Eltern haben, sehr viel mehr Bestätigung und Aufmerksamkeit für ihr positives Verhalten brauchen. Diese Kinder werden deshalb von einigen Lehrkräften für viel kleinere Schritte als andere Schüler gelobt. Einer Ihrer Kollegen fragt Sie nun, ob dadurch nicht auch eine Benachteiligung von nicht auffälligen Kindern stattfindet.</b></p> <ul style="list-style-type: none"> <li>○ Ich verstehe die Bedenken des Kollegen und versuche das nun auch in meinem Unterricht zu berücksichtigen (z.B. alle Kinder mehr loben). Allerdings mache ich den Kollegen darauf aufmerksam, dass diese Kinder vermutlich häufig mehr Lob brauchen, da ihnen der soziale Rückhalt fehlt. [4]</li> <li>○ Ich frage ihn, wie er denn in Zukunft damit umgehen möchte. Ich persönlich würde weiter wie bisher handeln, falls er aber weitere gute Argumente hat, könnte ich mich auch auf seine Meinung einlassen. [2.5]</li> <li>○ Ich finde diese Meinung sehr interessant und verstehe meinen Kollegen, deshalb nehme ich mir in Zukunft fest vor, alle Kinder gleich stark zu loben, um niemanden zu benachteiligen. [2.5]</li> <li>○ Ich denke, dass wir auch an die Zukunft der Schüler denken sollten. Wenn sie die ganze Zeit Lob in der Schule erfahren, können sie</li> </ul> | <p><b>In a troublesome class you teach, it is especially noticeable that children who come from an educationally deprived background and have little support from their parents need much more acknowledgment and attention for their positive behavior. These children are therefore praised by some teachers for taking much smaller steps than other pupils. One of your colleagues now asks you whether this does not also disadvantage children who are inconspicuous.</b></p> <ul style="list-style-type: none"> <li>○ I understand the colleague's concerns and now try to take this into account in my lessons (e.g., praise all children more). However, I draw the colleague's attention to the fact that these children most likely often do need more praise because they lack social support. [4]</li> <li>○ I ask him how he would like to deal with this in the future. Personally, I would continue to act as I currently do, but if he has additional convincing arguments, I could also accept his opinion. [2.5]</li> <li>○ I find this opinion very interesting, and I understand my colleague, therefore I firmly resolve to praise all children equally as not to disadvantage anyone in the future. [2.5]</li> <li>○ I think that we should also think about the future of the students. If they receive praise all the time at school, they may not be able to cope with real life. Maybe we should reduce excessive praise altogether. [1]</li> </ul> |

|    |                                                                                                                                                                                                                                                                                                                                                                                                                                                                                                                                                                                                                                                                                                                                                                                                                                                                                                                                                                                                                                                                                                                                                                                                                                                                                                                                                                                                                                                                                                                                                                         |                                                                                                                                                                                                                                                                                                                                                                                                                                                                                                                                                                                                                                                                                                                                                                                                                                                                                                                                                                                                                                                                                                                                                                                                                                                                                                                                                                                                    |
|----|-------------------------------------------------------------------------------------------------------------------------------------------------------------------------------------------------------------------------------------------------------------------------------------------------------------------------------------------------------------------------------------------------------------------------------------------------------------------------------------------------------------------------------------------------------------------------------------------------------------------------------------------------------------------------------------------------------------------------------------------------------------------------------------------------------------------------------------------------------------------------------------------------------------------------------------------------------------------------------------------------------------------------------------------------------------------------------------------------------------------------------------------------------------------------------------------------------------------------------------------------------------------------------------------------------------------------------------------------------------------------------------------------------------------------------------------------------------------------------------------------------------------------------------------------------------------------|----------------------------------------------------------------------------------------------------------------------------------------------------------------------------------------------------------------------------------------------------------------------------------------------------------------------------------------------------------------------------------------------------------------------------------------------------------------------------------------------------------------------------------------------------------------------------------------------------------------------------------------------------------------------------------------------------------------------------------------------------------------------------------------------------------------------------------------------------------------------------------------------------------------------------------------------------------------------------------------------------------------------------------------------------------------------------------------------------------------------------------------------------------------------------------------------------------------------------------------------------------------------------------------------------------------------------------------------------------------------------------------------------|
|    | <p>womöglich dem realen Leben auch nicht standhalten. Vielleicht sollten wir insgesamt mit übermäßigem Lob zurückfahren. [1]</p>                                                                                                                                                                                                                                                                                                                                                                                                                                                                                                                                                                                                                                                                                                                                                                                                                                                                                                                                                                                                                                                                                                                                                                                                                                                                                                                                                                                                                                        |                                                                                                                                                                                                                                                                                                                                                                                                                                                                                                                                                                                                                                                                                                                                                                                                                                                                                                                                                                                                                                                                                                                                                                                                                                                                                                                                                                                                    |
| 22 | <p><b>Die Schule, an der Sie unterrichten hat seit dem neuen Schuljahr neue Integrationsklassen und soll sich insgesamt mehr auf die Eingliederung von behinderten Schülern fokussieren. Eine Lehrerin kommt auf Sie zu und erklärt Ihnen, dass sie den Fokus des Direktors für falsch halte, denn früher habe das Schulsystem auch funktioniert und Inklusion könne auch weiterhin in Sonderschulen stattfinden.</b></p> <ul style="list-style-type: none"> <li>○ Ich freue mich über ihr Vertrauen, das sie mir entgegenbringt. Im Gespräch schildere ich meine Ansicht von Inklusion, als Basis eines gesellschaftlichen Miteinanders. Dabei meistern wir im Schulalltag nun mehr Herausforderungen, die aber neue und meist positive Facetten mit sich bringen. [4]</li> <li>○ Da es mich interessiert, was sie zu sagen hat, höre ich ihr geduldig und freundlich zu. Allerdings spiegelt das nicht meine Meinungen wider, weshalb ich meine eigenen Ansätze von Inklusion im Unterricht verankere. [3]</li> <li>○ Ich sage ihr, dass ich auch einige kritische Punkte an dem neuen System sehe und nun abwarten werde, wie es sich in den nächsten Wochen weiterentwickelt. Falls sich unsere Bedenken manifestieren, können wir ja gemeinsam zum Direktor gehen. [2]</li> <li>○ Ich freue mich, dass sie mit ihren Bedenken zu mir gekommen ist. Ich gebe ihr Recht und frage sie, ob wir gemeinsam mal zum Direktor gehen sollen – um ihn auch auf die Benachteiligung von Regelschulkindern durch den Fokus auf Inklusion aufmerksam zu machen. [1]</li> </ul> | <p><b>The school where you teach has introduced new inclusive classes for the new school year and is expected to focus more on the inclusion of students with disabilities. A teacher comes to you and shares that she thinks the principal's focus is misguided because the former school system worked; inclusion should continue to take place in special schools.</b></p> <ul style="list-style-type: none"> <li>○ I am pleased about her trust in me. In the conversation, I describe my view of inclusion as the basis of social coexistence. We are now facing more challenges in everyday school life, but they bring new and mostly positive facets too. [4]</li> <li>○ Since I am interested in what she has to say, I listen to her patiently and kindly. However, it does not reflect my opinions, which is why I anchor my own approaches towards inclusion in the lessons. [3]</li> <li>○ I tell her that I also see some critical points about the new system and will now wait to see how it evolves over the next few weeks. If our concerns manifest themselves, we can talk to the principal together. [2]</li> <li>○ I am glad that she contacted me with her concerns. I agree with her and ask her if we should go to the principal together – in order to make him aware of the disadvantages towards regular school children due to the focus on inclusion. [1]</li> </ul> |
