# Supplementary material for: Konstruktion und Validierung eines Assessments von Offenheit für Vielfalt für (angehende) Lehrer und Lehrerinnen
Source: Atypon-hosted journal article supplement (doi:10.1024/1010-0652/a000354), 2022-11-29
Supplement: 1010-0652_a000354_esm3.pdf [file 1010-0652_a000354_esm3.pdf]

## ESM 3

*Darstellung der Verteilung aller Skalen*

|                                     | <i>M</i> | <i>SD</i> | <i>Min</i> | <i>Max</i> | <i>Schiefe</i> | <i>Fehler</i> | <i>Exzess</i> | <i>Fehler</i> |
|-------------------------------------|----------|-----------|------------|------------|----------------|---------------|---------------|---------------|
| <b>OfV</b>                          |          |           |            |            |                |               |               |               |
|                                     |          |           | 31.50      | 88.00      |                |               |               |               |
|                                     |          | 10.4      | von        | von        |                |               |               |               |
| <b>OfV</b>                          | 68.69    | 1         | 24.00      | 88.00      | -.58           | .16           | .23           | .33           |
| <b>PVQ</b>                          |          |           |            |            |                |               |               |               |
| <b>Macht</b>                        | 3.33     | 1.14      | 1.00       | 6.00       | .22            | .17           | -.59          | .33           |
| <b>Leistung</b>                     | 4.49     | 1.00      | 1.00       | 6.00       | -.48           | .17           | -.20          | .33           |
| <b>Hedonismus</b>                   | 5.03     | .85       | 1.00       | 6.00       | -1.18          | .17           | 2.14          | .33           |
| <b>Stimulation</b>                  | 4.45     | 1.02      | 1.00       | 6.00       | -.69           | .17           | .57           | .33           |
| <b>Selbstbestimmung</b>             | 4.73     | .75       | 1.00       | 6.00       | -1.16          | .17           | 3.03          | .33           |
| <b>Universalismus</b>               | 4.55     | .81       | 1.00       | 6.00       | -.53           | .17           | .68           | .33           |
| <b>Benevolenz</b>                   | 4.75     | .79       | 1.00       | 6.00       | -1.01          | .17           | 2.21          | .33           |
| <b>Tradition</b>                    | 3.20     | .96       | 1.00       | 6.00       | .35            | .17           | .04           | .33           |
| <b>Konformität</b>                  | 3.79     | .89       | 1.00       | 6.00       | -.10           | .17           | .23           | .33           |
| <b>Sicherheit</b>                   | 4.12     | .85       | 1.00       | 6.00       | -.52           | .17           | .56           | .33           |
| <b>NEO-FFI</b>                      |          |           |            |            |                |               |               |               |
| <b>Extraversion</b>                 | 3.44     | .50       | 2.08       | 4.50       | -.40           | .17           | -.34          | .33           |
| <b>Verträglichkeit</b>              | 3.59     | .56       | 1.08       | 4.67       | -.91           | .17           | 1.53          | .33           |
| <b>Gewissenhaftigkeit</b>           | 3.48     | .71       | 1.42       | 5.00       | -.32           | .17           | -.11          | .33           |
| <b>Neurotizismus</b>                | 2.65     | .62       | 1.17       | 4.33       | .46            | .17           | .20           | .33           |
| <b>Offenheit</b>                    | 3.49     | .57       | 2.25       | 4.75       | .14            | .17           | -.89          | .33           |
| <b>TEIQue</b>                       |          |           |            |            |                |               |               |               |
| <b>Empathie</b>                     | 5.27     | .88       | 3.00       | 7.00       | -.32           | .17           | -.42          | .33           |
| <b>soziale Kompetenz</b>            | 4.91     | .80       | 2.18       | 7.00       | .01            | .17           | -.06          | .33           |
| <b>Emotionswahrnehmung</b>          | 4.71     | .86       | 2.50       | 6.70       | -.07           | .17           | -.50          | .33           |
| <b>KSA</b>                          |          |           |            |            |                |               |               |               |
| <b>Autoritarismus</b>               | 2.51     | .71       | 1.11       | 5.00       | .42            | .17           | .10           | .33           |
| <b>KSE-G / soz. Erwünschtheit</b>   |          |           |            |            |                |               |               |               |
| <b>Übertreibung pos. Qual. (PQ)</b> | 3.31     | .69       | 1.67       | 5.00       | .14            | .17           | -.37          | .33           |
| <b>Minimierung neg. Qual. (NQ)</b>  | 2.57     | .88       | 1.00       | 5.00       | .22            | .17           | -.49          | .33           |
