# Supplementary material for: Konstruktion und Validierung eines Assessments von Offenheit für Vielfalt für (angehende) Lehrer und Lehrerinnen
Source: Atypon-hosted journal article supplement (doi:10.1024/1010-0652/a000354), 2022-11-29
Supplement: 1010-0652_a000354_esm4.pdf [file 1010-0652_a000354_esm4.pdf]

ESM 4. Zusammenhänge des OFV mit den erhobenen Merkmalen

|                          | 1      | 2      | 3     | 4      | 5     | 6      | 7     | 8     | 9      | 10    | 11     | 12     | 13     | 14     | 15    | 16     | 17     | 18     | 19     | 20     | 21     | 22    | 23     | 24    | 25    | 26    | 27   | 28     |
|--------------------------|--------|--------|-------|--------|-------|--------|-------|-------|--------|-------|--------|--------|--------|--------|-------|--------|--------|--------|--------|--------|--------|-------|--------|-------|-------|-------|------|--------|
| 1 OFV                    |        |        |       |        |       |        |       |       |        |       |        |        |        |        |       |        |        |        |        |        |        |       |        |       |       |       |      |        |
| 2 Geschlecht             | -.38** |        |       |        |       |        |       |       |        |       |        |        |        |        |       |        |        |        |        |        |        |       |        |       |       |       |      |        |
| 3 pol. Interesse         | .15*   | .20**  |       |        |       |        |       |       |        |       |        |        |        |        |       |        |        |        |        |        |        |       |        |       |       |       |      |        |
| 4 pol. Orientierung      | -.26** | .15*   | -.00  |        |       |        |       |       |        |       |        |        |        |        |       |        |        |        |        |        |        |       |        |       |       |       |      |        |
| 5 Ehrenamt               | .06    | .07    | .11   | .10    |       |        |       |       |        |       |        |        |        |        |       |        |        |        |        |        |        |       |        |       |       |       |      |        |
| 6 Macht                  | -.19** | .24**  | .20** | .20**  | .19** |        |       |       |        |       |        |        |        |        |       |        |        |        |        |        |        |       |        |       |       |       |      |        |
| 7 Leistung               | .04    | -.01   | .09   | .12    | .17*  | .56**  |       |       |        |       |        |        |        |        |       |        |        |        |        |        |        |       |        |       |       |       |      |        |
| 8 Hedonismus             | -.04   | -.04   | -.10  | .06    | .01   | .21**  | .43** |       |        |       |        |        |        |        |       |        |        |        |        |        |        |       |        |       |       |       |      |        |
| 9 Stimulation            | .15*   | -.01   | .1    | -.02   | .12   | .24**  | .36** | .53** |        |       |        |        |        |        |       |        |        |        |        |        |        |       |        |       |       |       |      |        |
| 10 Selbstbestimmung      | .25**  | -.05   | .20** | .00    | .11   | .27**  | .52** | .53** | .52**  |       |        |        |        |        |       |        |        |        |        |        |        |       |        |       |       |       |      |        |
| 11 Universalismus        | .45**  | -.15*  | .13*  | -.18** | .09   | -.08   | .18** | .25** | .28**  | .50** |        |        |        |        |       |        |        |        |        |        |        |       |        |       |       |       |      |        |
| 12 Benevolenz            | .42**  | -.24** | .13   | -.10   | .12   | -.09   | .20** | .27** | .31**  | .43** | .59**  |        |        |        |       |        |        |        |        |        |        |       |        |       |       |       |      |        |
| 13 Tradition             | -.02   | -.10   | -.01  | -.01   | .07   | .02    | .06   | .07   | .09    | .01   | .23**  | .19**  |        |        |       |        |        |        |        |        |        |       |        |       |       |       |      |        |
| 14 Konformität           | .21**  | -.09   | .04   | -.03   | .05   | .10    | .25** | .11   | .02    | .18** | .34**  | .41**  | .52**  |        |       |        |        |        |        |        |        |       |        |       |       |       |      |        |
| 15 Sicherheit            | .07    | -.04   | .02   | .03    | .08   | .19**  | .33** | .32** | .17*   | .32** | .26**  | .32**  | .37**  | .55**  |       |        |        |        |        |        |        |       |        |       |       |       |      |        |
| 16 Offenheit             | .19**  | -.07   | .28** | -.05   | .09   | -.00   | .07   | .00   | .06    | .35** | .25**  | .15*   | -.26** | -.08   | -.12  |        |        |        |        |        |        |       |        |       |       |       |      |        |
| 17 Gewissenhaftigkeit    | .24**  | -.08   | .12   | .05    | .16*  | .12    | .30** | .01   | .03    | .17*  | .12    | .15*   | .09    | .32**  | .32** | .01    |        |        |        |        |        |       |        |       |       |       |      |        |
| 18 Extraversion          | .18**  | -.1    | .16*  | -.08   | .05   | .14*   | .24** | .25** | .38**  | .22** | .14*   | .38**  | -.03   | .11    | .08   | -.01   | .27**  |        |        |        |        |       |        |       |       |       |      |        |
| 19 Verträglichkeit       | .43**  | -.19** | -.03  | -.18** | -.02  | -.40** | -.14* | .03   | .01    | .09   | .41**  | .50**  | .11    | .31**  | .12   | -.00   | .24**  | .23**  |        |        |        |       |        |       |       |       |      |        |
| 20 Neurotizismus         | .02    | -.34** | -.15* | -.06   | -.11  | -.17*  | -.05  | -.08  | -.23** | -.09  | .04    | -.03   | .02    | .10    | .02   | .14*   | -.17** | -.28** | -.1    |        |        |       |        |       |       |       |      |        |
| 21 T_Empathie            | .39**  | -.22** | .16*  | -.14*  | .12   | -.13   | .04   | .11   | .09    | .29** | .43**  | .52**  | -.02   | .26**  | .18** | .29**  | .22**  | .24**  | .47**  | -.01   |        |       |        |       |       |       |      |        |
| 22 T_sozi_Kompetenz      | .14*   | .04    | .29** | .07    | .23** | .41**  | .34** | .20** | .26**  | .32** | .10    | .19**  | -.12   | .05    | .10   | .17*   | .45**  | .42**  | .08    | -.33** | .36**  |       |        |       |       |       |      |        |
| 23 T_Emotionswahrnehmung | .17*   | .03    | .15*  | .11    | .18** | .1     | .21** | .13*  | .05    | .26** | .17*   | .18**  | -.04   | .20**  | .18** | .18**  | .39**  | .19**  | .26**  | -.16*  | .42**  | .44** |        |       |       |       |      |        |
| 24 KSA_allgemein         | -.41** | .21**  | -.02  | .21**  | .18** | .25**  | .15*  | .17*  | .04    | -.06  | -.15*  | -.09   | .41**  | .26**  | .32** | -.27** | .14*   | .03    | -.16*  | .04    | -.11   | .09   | .07    |       |       |       |      |        |
| 25 KSA_Aggression        | -.45** | .23**  | 0     | .24**  | .12   | .15*   | .10   | .10   | -.01   | -.12  | -.20** | -.18** | .27**  | .14*   | .27** | -.25** | .09    | -.06   | -.26** | .08    | -.13   | -.01  | .06    | .84** |       |       |      |        |
| 26 KSA_Unterwürfigkeit   | -.29** | .15*   | .03   | .14*   | .17*  | .26**  | .12   | .14*  | .06    | .03   | -.08   | -.04   | .17*   | .13    | .21** | -.06   | .12    | .04    | -.10   | -.01   | -.08   | .20** | .04    | .76** | .45** |       |      |        |
| 27 KSA_Konventionalismus | -.21** | .11    | -.07  | .09    | .14*  | .17*   | .14*  | .17*  | .05    | -.04  | -.07   | .03    | .56**  | .35**  | .26** | -.35** | .12    | .10    | -.01   | .03    | -.04   | .04   | .06    | .75** | .48** | .33** |      |        |
| 28 KSE_PQ                | .16*   | .11    | .07   | .01    | .20** | -.06   | .01   | -.00  | .06    | .18** | .23**  | .23**  | .08    | .25**  | .03   | .10    | .26**  | .12    | .34**  | -.20** | .34**  | .26** | .28**  | .15*  | .07   | .15*  | .14* |        |
| 29 KSE_NQ                | -.30** | .17*   | .06   | .25**  | .01   | .24**  | .08   | .09   | .02    | -.07  | -.25** | -.28** | -.12   | -.26** | -.05  | .03    | -.28** | -.07   | -.56** | .15*   | -.30** | -.08  | -.23** | .15*  | .24** | .09   | .01  | -.25** |
