# Supplementary material for: Konstruktion und Validierung eines Assessments von Offenheit für Vielfalt für (angehende) Lehrer und Lehrerinnen
Source: Atypon-hosted journal article supplement (doi:10.1024/1010-0652/a000354), 2022-11-29
Supplement: 1010-0652_a000354_esm5.pdf [file 1010-0652_a000354_esm5.pdf]

ESM 5. Zusammenhänge der dreifaktoriellen Struktur des OfV mit den erhobenen Merkmalen

|                          | OfV Migration | OfV Inklusion | OfV Status |
|--------------------------|---------------|---------------|------------|
| <i>MW</i>                | 40.61         | 24.82         | 6.06       |
| <i>SD</i>                | 6.32          | 4.49          | 1.58       |
| 1 Geschlecht             | -.37**        | -.28**        | -.32**     |
| 2 pol. Interesse         | .14*          | .14*          | 0.08       |
| 3 pol. Orientierung      | -.28**        | -.20**        | -.16*      |
| 4 Ehrenamt               | 0.06          | 0.05          | 0.01       |
| 5 Macht                  | -.20**        | -.16*         | -0.08      |
| 6 Leistung               | 0.02          | 0.01          | 0.08       |
| 7 Hedonismus             | -0.06         | -0.00         | -0.04      |
| 8 Stimulation            | .13*          | .14*          | 0.013      |
| 9 Selbstbestimmung       | .25**         | .23**         | .14*       |
| 10 Universalismus        | .41**         | .38**         | .33**      |
| 11 Benevolenz            | .38**         | .39**         | .32**      |
| 12 Tradition             | 0.02          | -0.07         | -0.01      |
| 13 Konformität           | .18**         | .18**         | .21**      |
| 14 Sicherheit            | 0.05          | 0.07          | 0.10       |
| 15 Offenheit             | .17*          | .19**         | 0.07       |
| 16 Gewissenhaftigkeit    | .25**         | .16*          | .16*       |
| 17 Extraversion          | .15*          | .17*          | 0.12       |
| 18 Verträglichkeit       | .42**         | .34**         | .33**      |
| 19 Neurotizismus         | 0.04          | -0.01         | 0.09       |
| 20 T_Empathie            | .37**         | .34**         | .31**      |
| 21 T_soiz_Kompetenz      | .15*          | 0.10          | 0.04       |
| 22 T_Emotionswahrnehmung | .15*          | .20**         | 0.08       |
| 23 KSA_allgemein         | -.39**        | -.38**        | -.25**     |
| 24 KSA_Aggression        | -.43**        | -.40**        | -.26**     |
| 25 KSA_Unterwürfigkeit   | -.27**        | -.26**        | -.16*      |
| 26 KSA_Konventionalismus | -.19**        | -.20**        | -.15*      |
| 27 KSE_PQ                | .18**         | 0.13          | 0.03       |
| 28 KSE_NQ                | -.31**        | -.17*         | -.26**     |
