# Supplementary material for: Konstruktion und Validierung eines Assessments von Offenheit für Vielfalt für (angehende) Lehrer und Lehrerinnen
Source: Atypon-hosted journal article supplement (doi:10.1024/1010-0652/a000354), 2022-11-29
Supplement: 1010-0652_a000354_esm6.pdf [file 1010-0652_a000354_esm6.pdf]

ESM 6. Faktorladungen der berechneten Strukturmodelle

|             | G-Faktor | Drei Faktoren Modell          |
|-------------|----------|-------------------------------|
|             |          | <i>Faktor Migration</i>       |
| Situation10 | 0.474    | x                             |
| Situation2  | x        | 0.481                         |
| Situation6  | 0.474    | 0.474                         |
| Situation8  | 0.567    | 0.567                         |
| Situation12 | 0.590    | 0.591                         |
| Situation14 | 0.510    | 0.510                         |
| Situation17 | 0.391    | 0.390                         |
| Situation18 | 0.399    | 0.399                         |
| Situation20 | 0.552    | 0.553                         |
| Situation28 | 0.450    | 0.450                         |
| Situation32 | 0.509    | 0.509                         |
| Situation35 | 0.539    | 0.539                         |
| Situation36 | 0.555    | 0.556                         |
|             |          | <i>Faktor Behinderungen</i>   |
| Situation31 | 0.613    | x                             |
| Situation7  | 0.535    | 0.547                         |
| Situation9  | 0.624    | 0.638                         |
| Situation13 | 0.489    | 0.499                         |
| Situation23 | 0.533    | 0.546                         |
| Situation25 | 0.438    | 0.448                         |
| Situation41 | 0.482    | 0.493                         |
|             |          | <i>Faktor sozialer Status</i> |
| Situation38 | 0.536    | x                             |
| Situation39 | 0.436    | 0.372                         |

Anmerkungen: Alle Ladungen sind signifikant ( $p < .001$ ); mit x wurden Ladungen gekennzeichnet, die im Modell fixiert wurden.

Latente Interkorrelationen des Modells mit 3 Faktoren

|                             | Faktor Behinderungen | Faktor sozialer Status |
|-----------------------------|----------------------|------------------------|
| <i>Faktor Migration</i>     | 0.963**              | 0.905**                |
| <i>Faktor Behinderungen</i> |                      | 0.899**                |
